# Supplementary material for: An iterative, facile stereoselective synthesis of C1-C11 fragment of borrelidin via enzymatic desymmetrization strategy
Source: Royal Society of Chemistry journal article supplement (doi:10.1039/c3ra22754e), 2013-01-01

## Supporting Information

### **An Iterative, Facile Stereoselective Synthesis of C1-C11 Fragment of Borrelidin *via* Enzymatic desymmetrization Strategy**

J. S. Yadav,\* Nagendra Nath Yadav

Natural Product Chemistry Division

Indian Institute of Chemical Technology

Hyderabad-500 007 (India)

Fax: (+91) 40-2716-0512

E-mail: yadavpub@iict.res.in

---

|                                                                                        |         |
|----------------------------------------------------------------------------------------|---------|
| <sup>1</sup> H and <sup>13</sup> C NMR for compound <b>7 – 14</b>                      | S1-S16  |
| HPLC for compound <b>14</b>                                                            | S17-S17 |
| <sup>1</sup> H and <sup>13</sup> C NMR for compound <b>4 – 6, 15 - 27</b> and <b>2</b> | S18-S52 |

S1

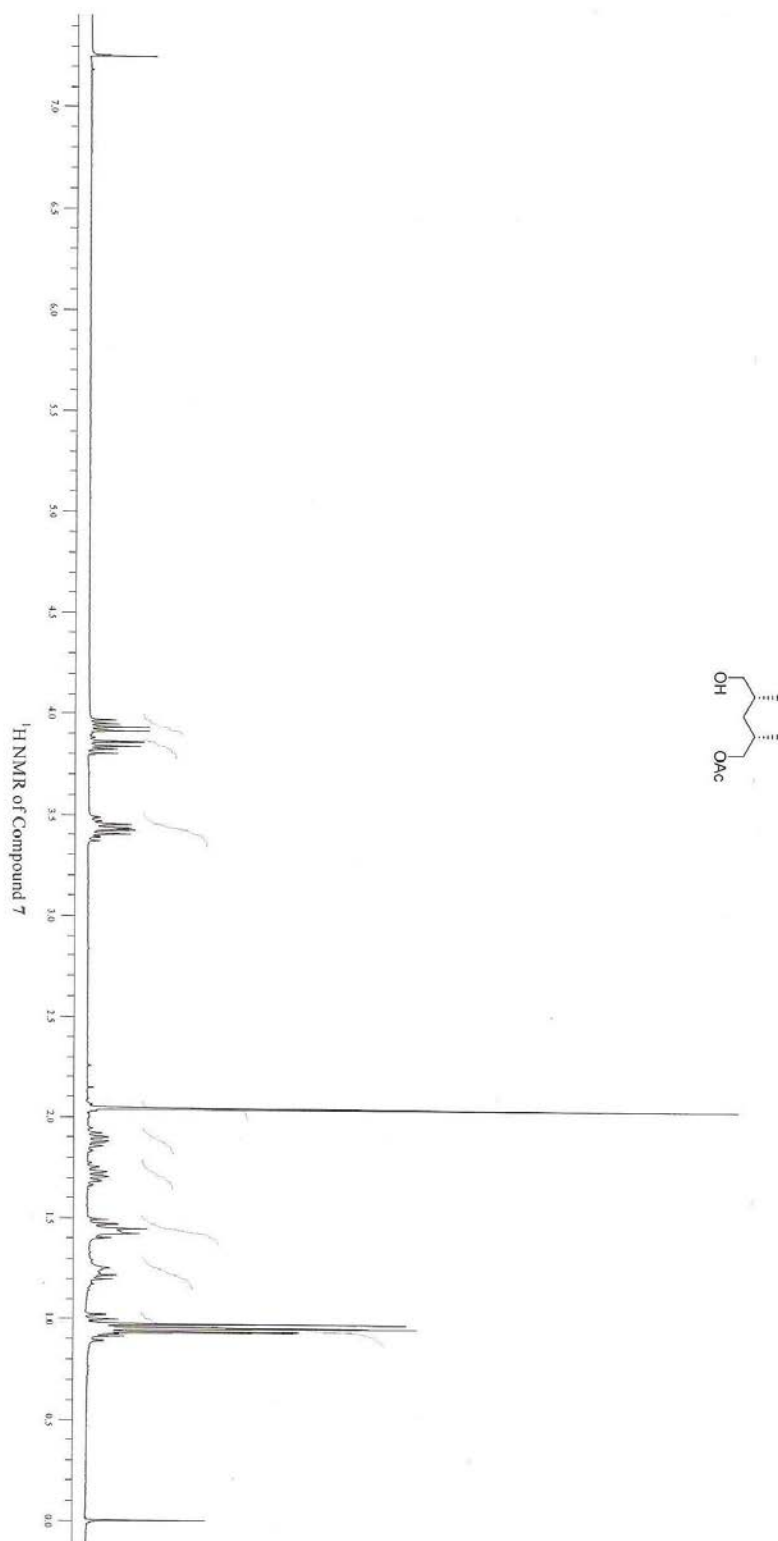

S2

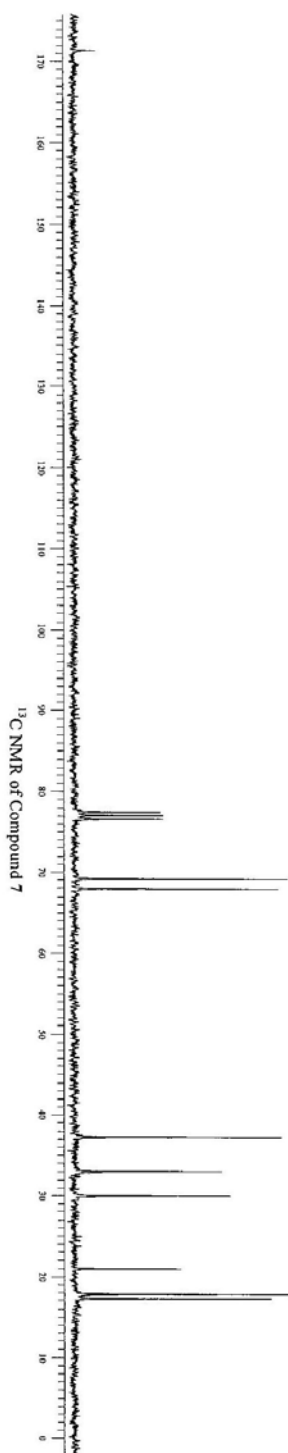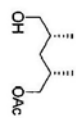

S3

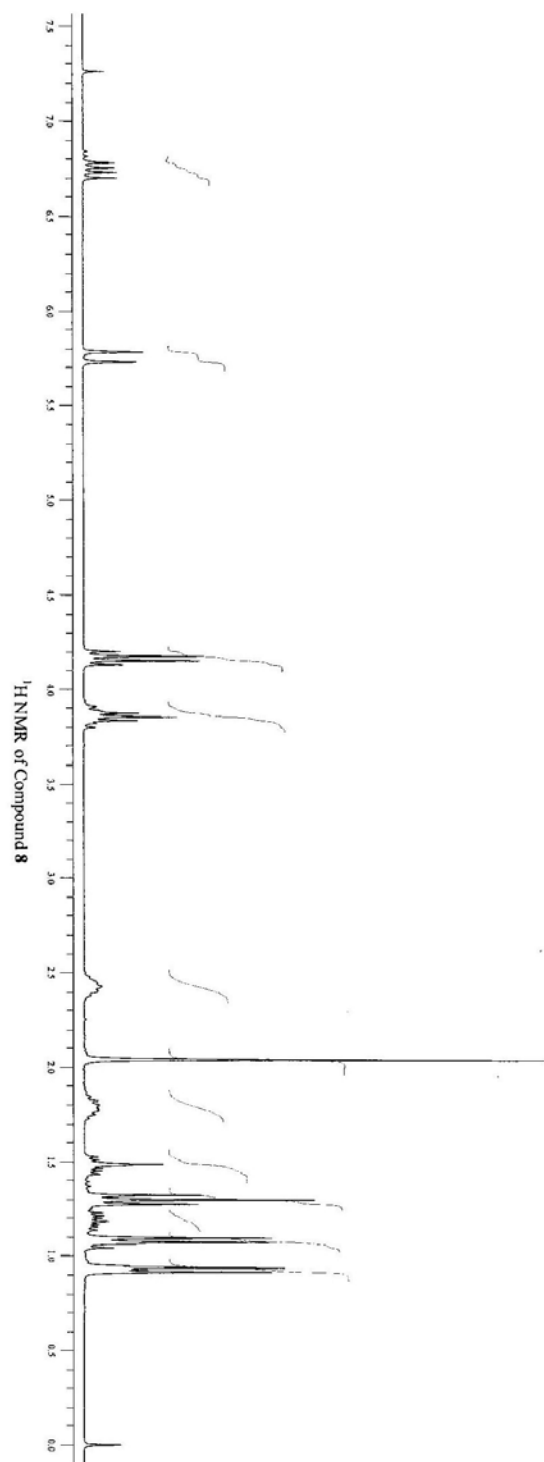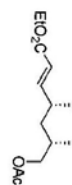

S4

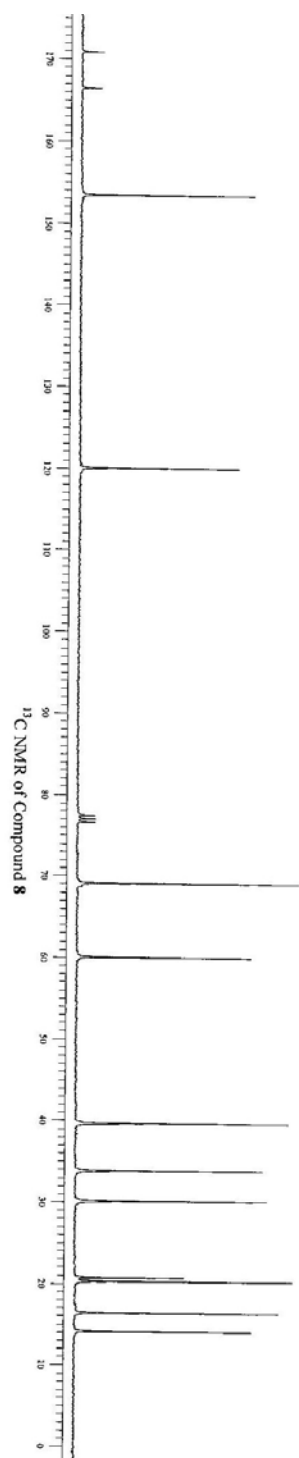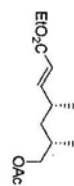

S5

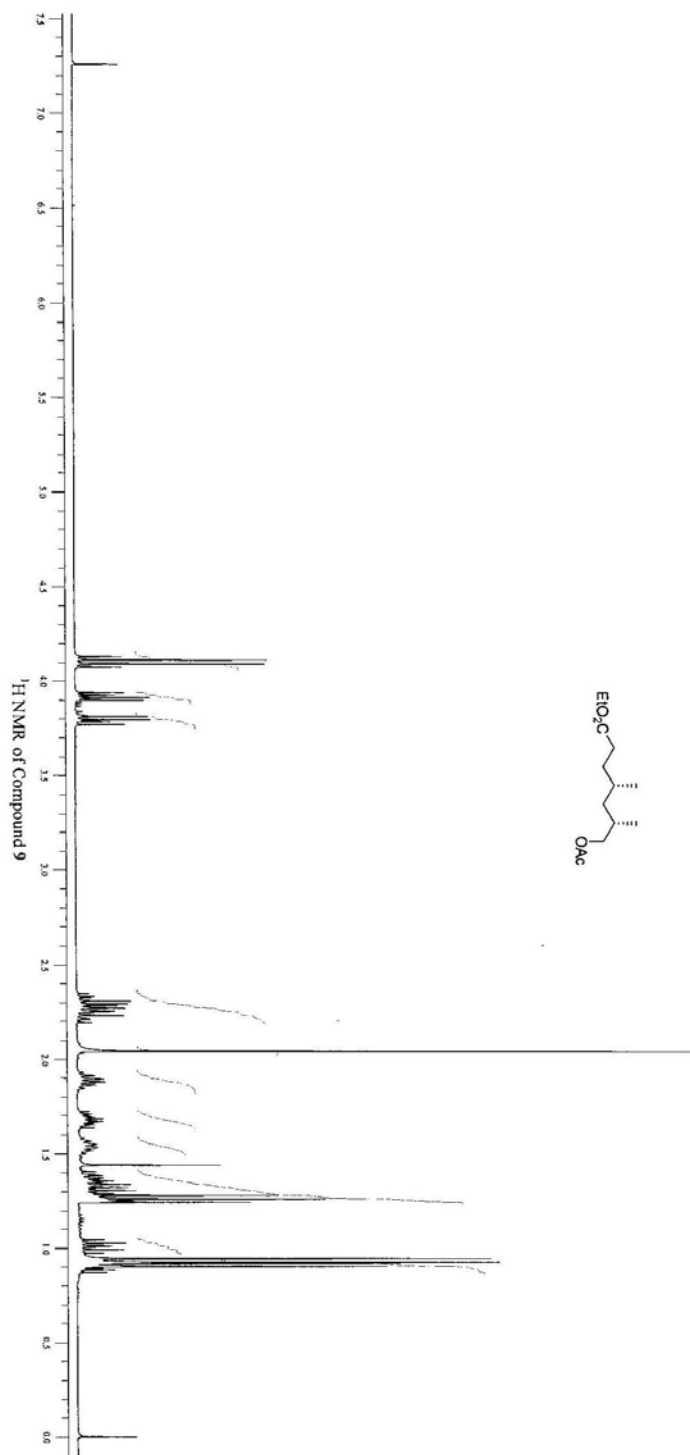

S6

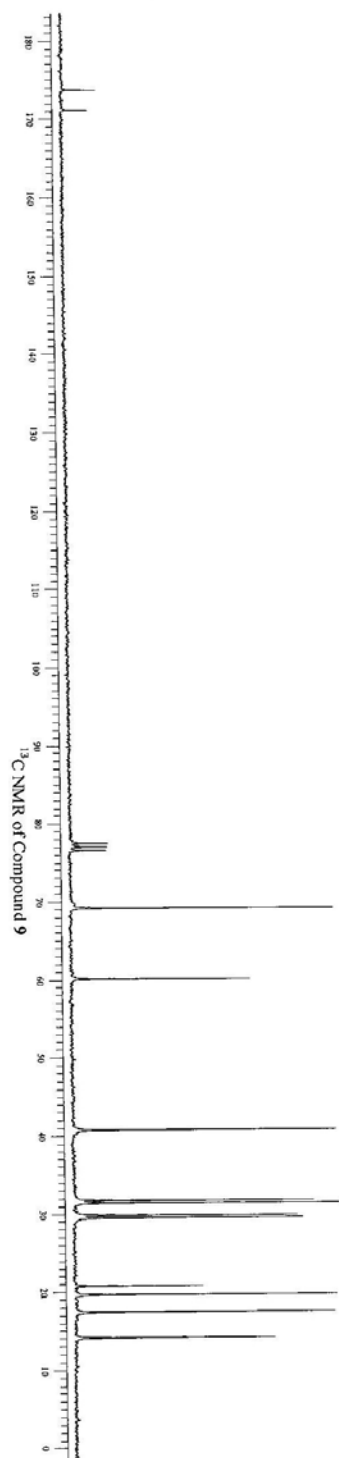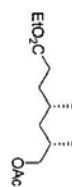

S7

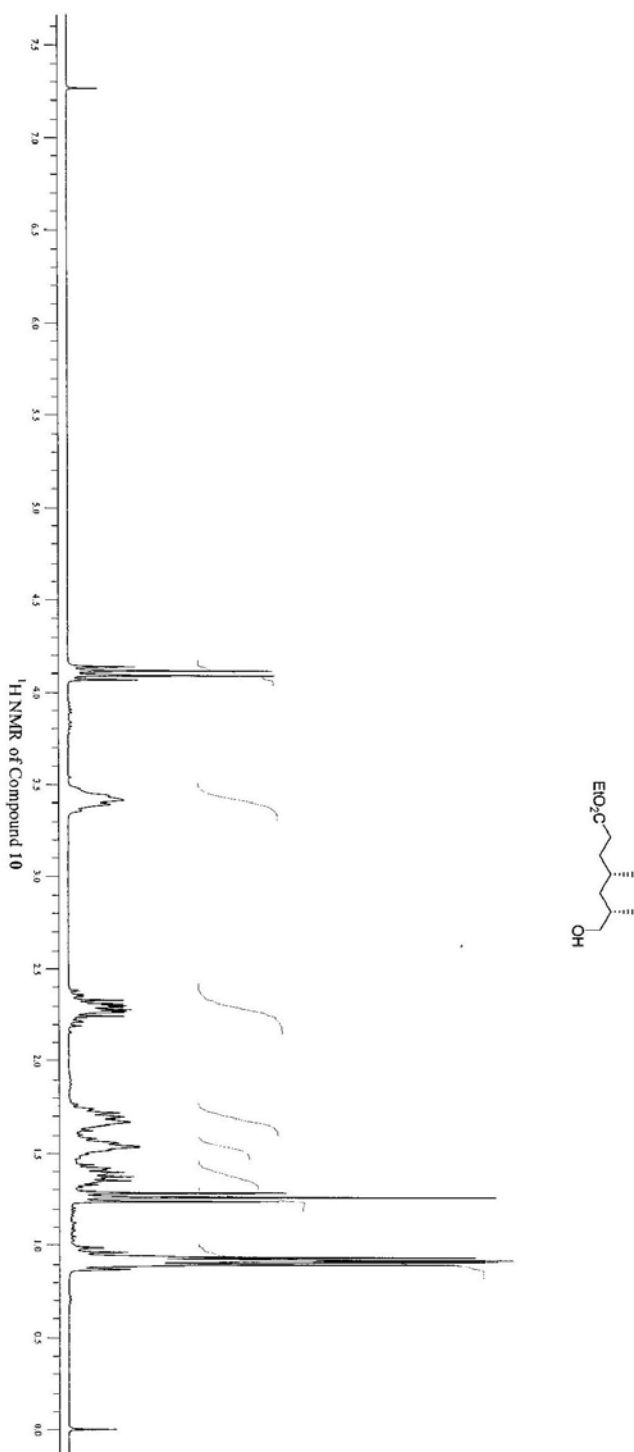



S8

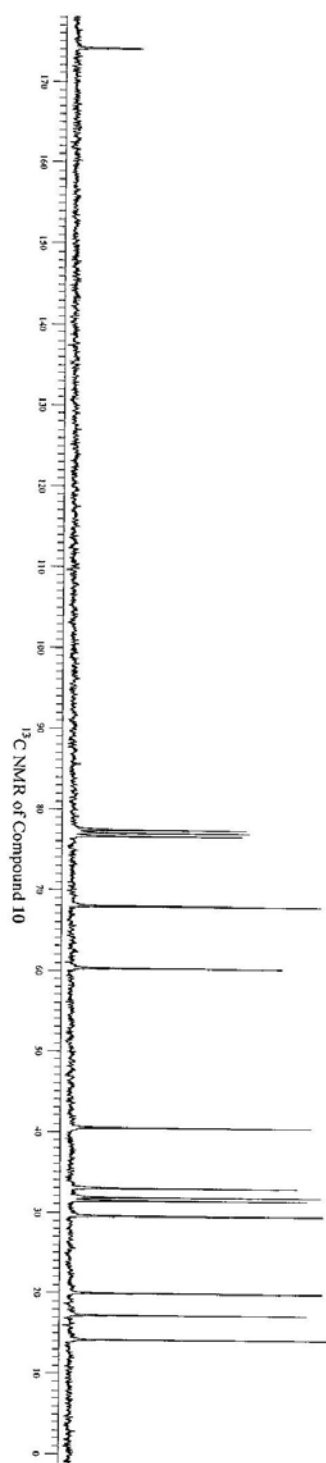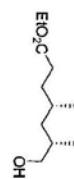

S9

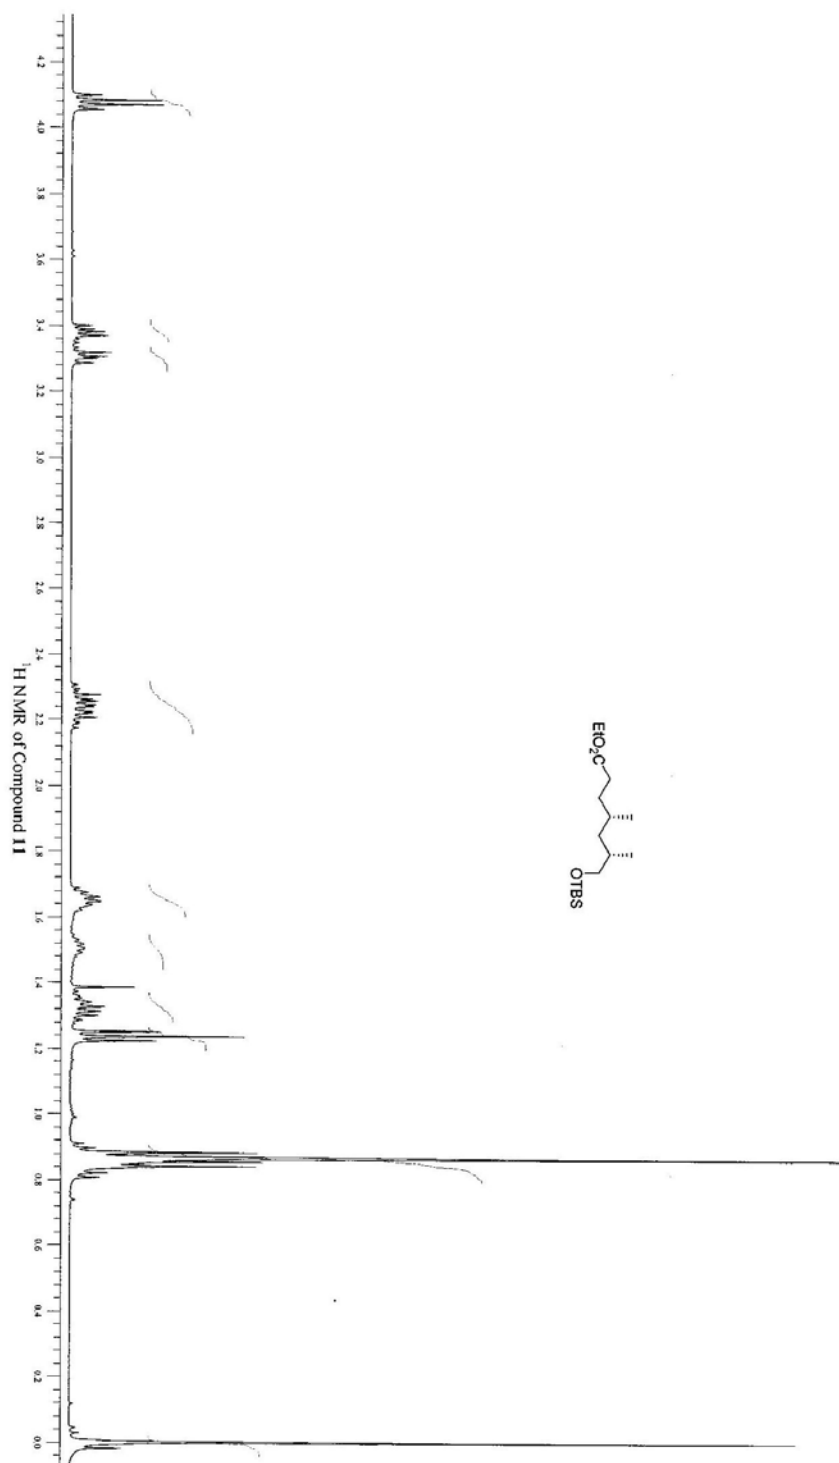



S11

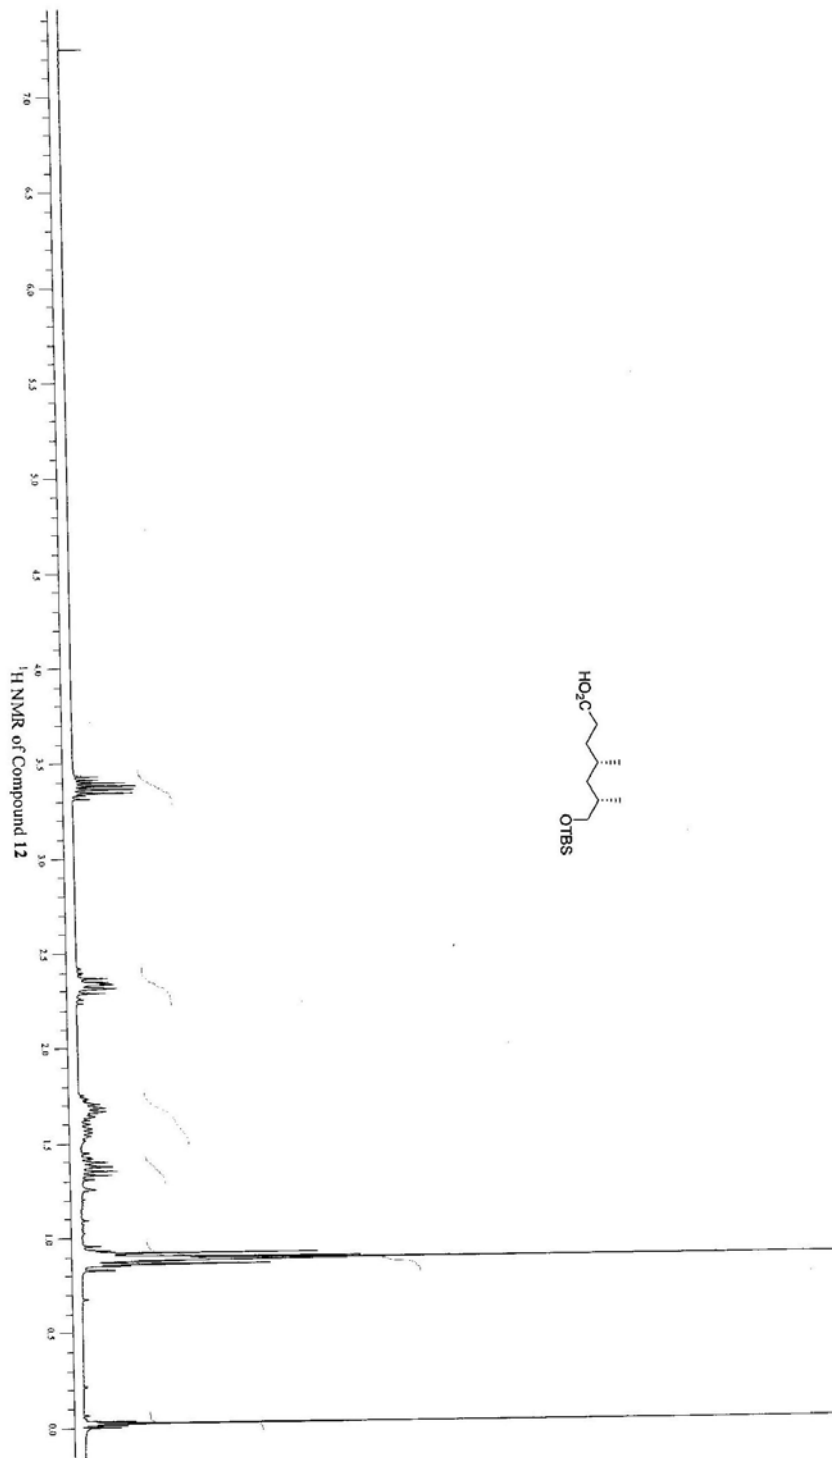



S13

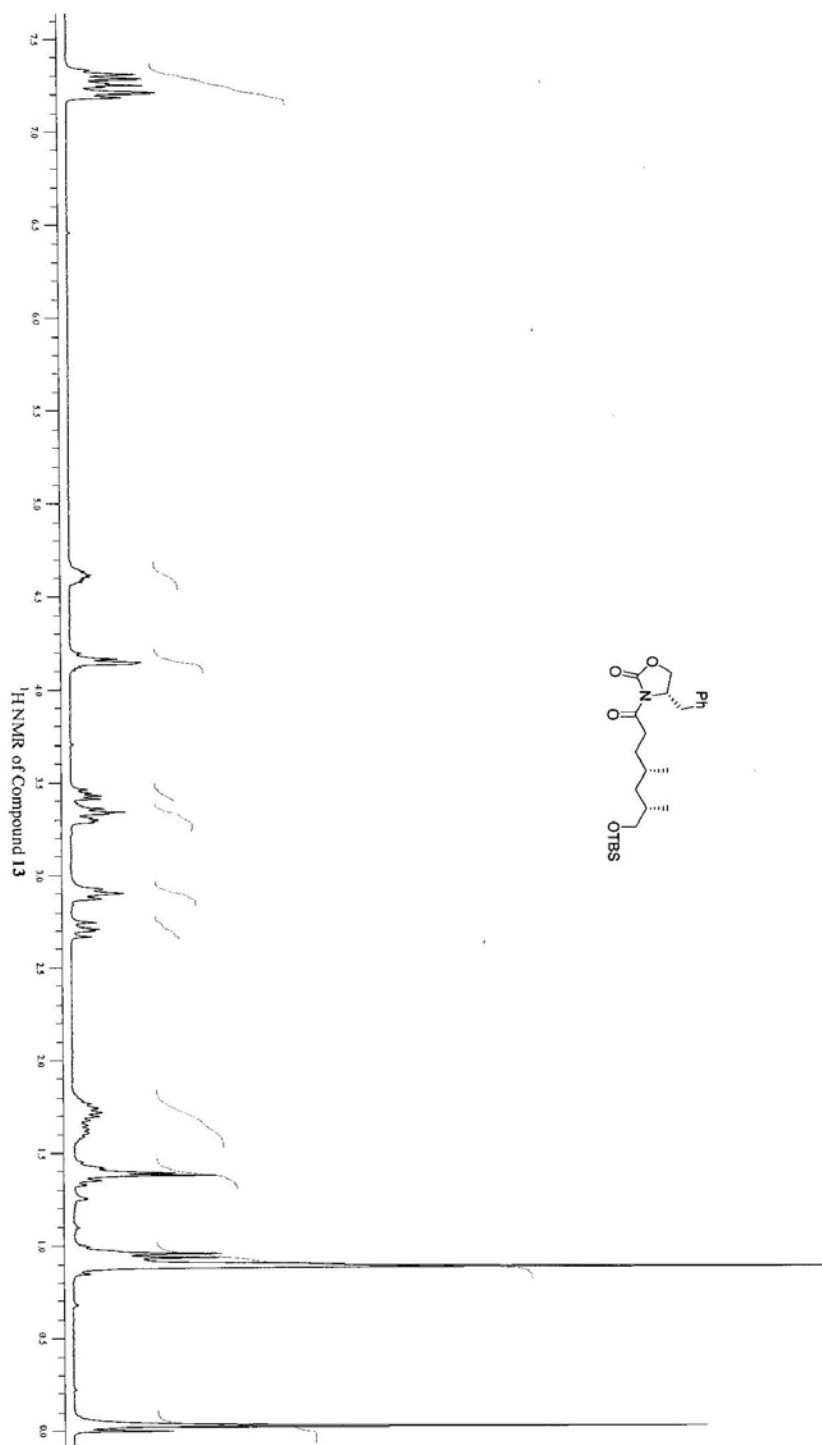

S14

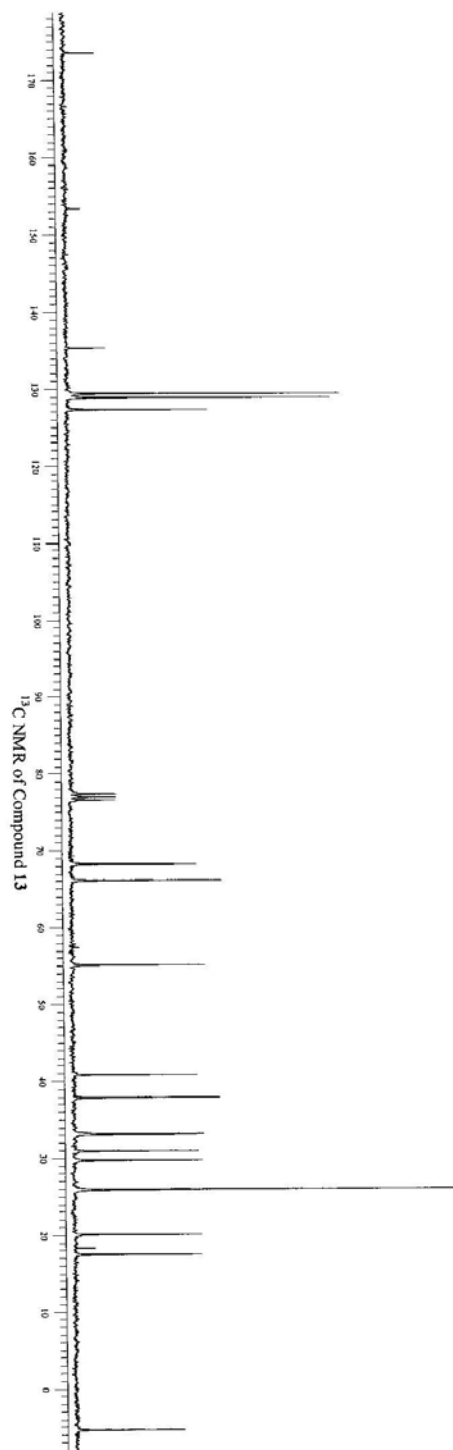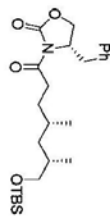

S15

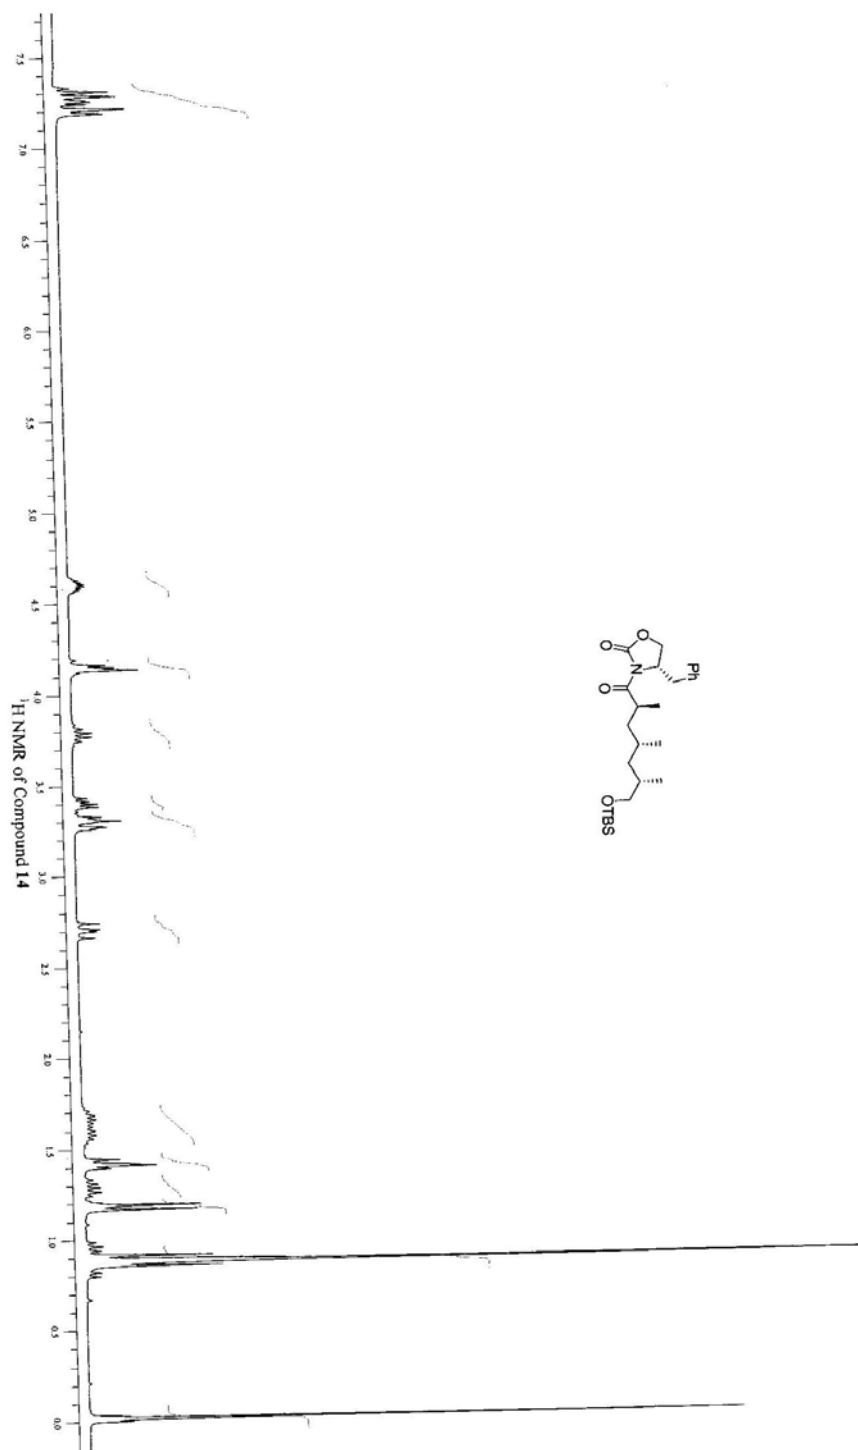



S16

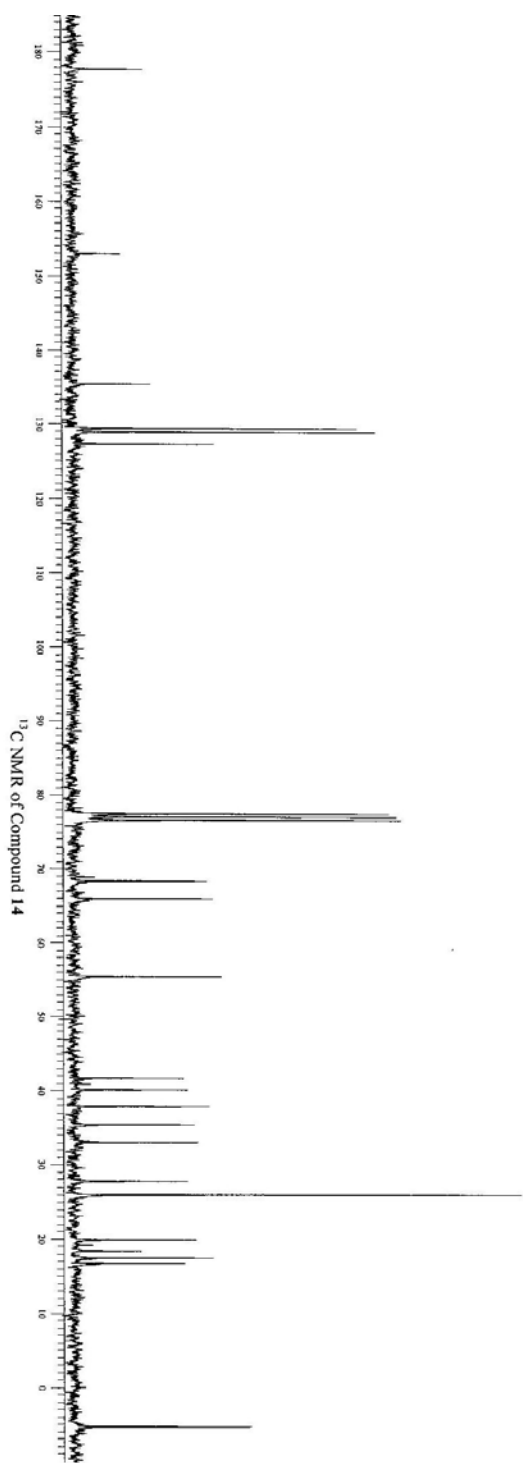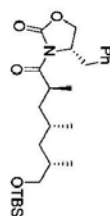

S17

## HPLC REPORT

### Sample Information

Acquired by : Admin  
Sample Name : jsy-nny  
Sample ID : jsy-nny  
Injection Volume : 20 uL  
Data Filename : 20121221.lcd  
Method Filename : naidupali.lcm  
Batch Filename :  
Report Filename : RK.lcr  
Date Acquired : 12/20/2012 11:23:38 AM

### Chromatogram

jsy-nny E:\HPLC\pesticides\New Folder\20121221.lcd

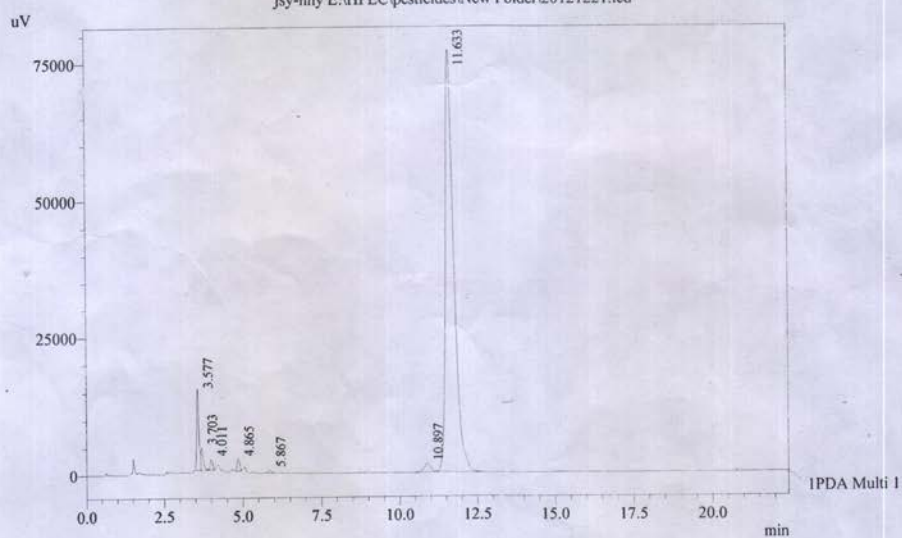

1 PDA Multi 1 / 254nm 4nm

### PeakTable

| Peak# | Ret. Time | Area    | Area %  | Resolution |
|-------|-----------|---------|---------|------------|
| 1     | 3.577     | 73659   | 4.677   | 0.000      |
| 2     | 3.703     | 21948   | 1.394   | 0.612      |
| 3     | 4.011     | 10333   | 0.656   | 1.452      |
| 4     | 4.865     | 12070   | 0.766   | 5.170      |
| 5     | 5.867     | 3300    | 0.210   | 5.670      |
| 6     | 10.897    | 23263   | 1.477   | 17.224     |
| 7     | 11.633    | 1430265 | 90.820  | 1.673      |
| Total |           | 1574837 | 100.000 |            |

S18

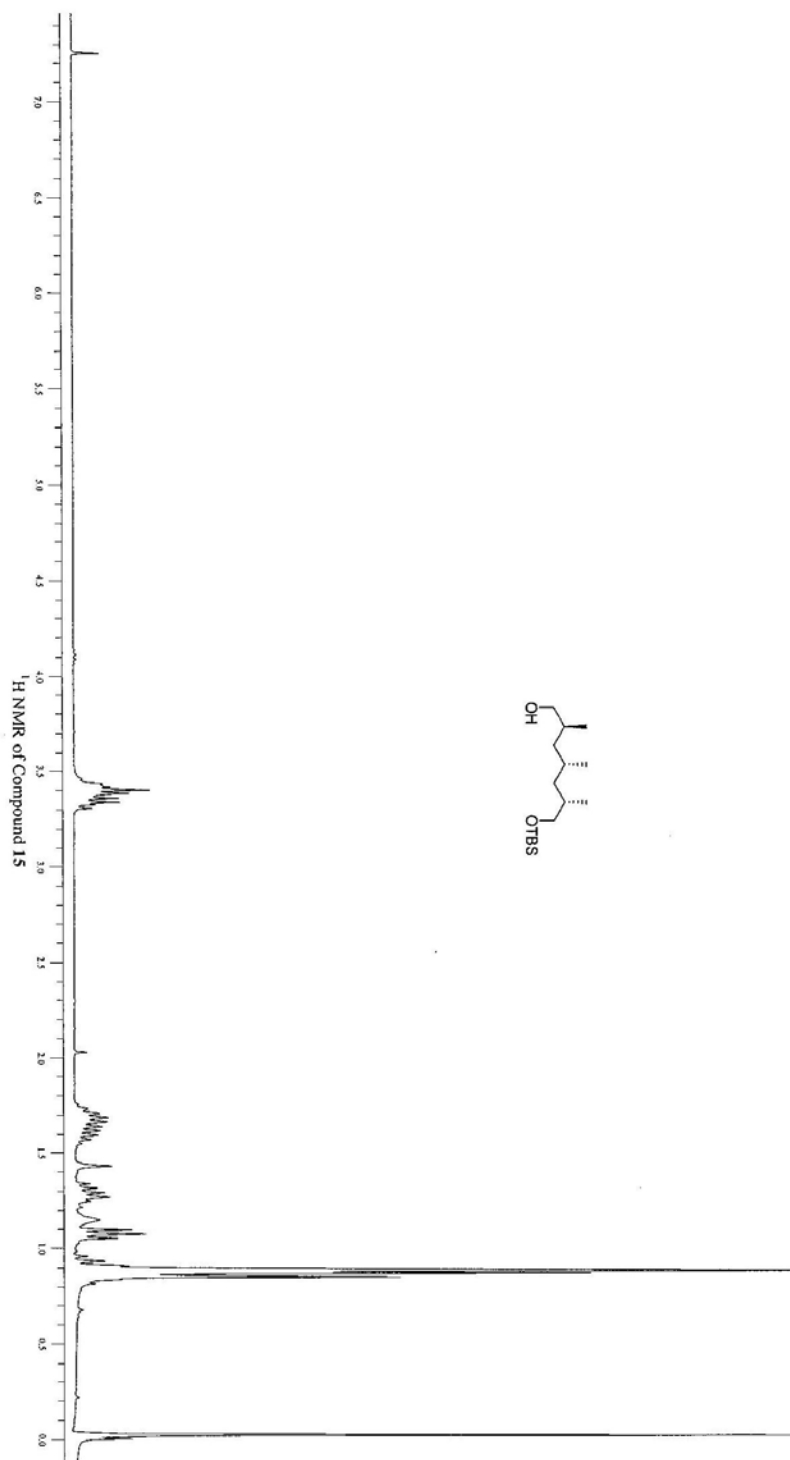

S19

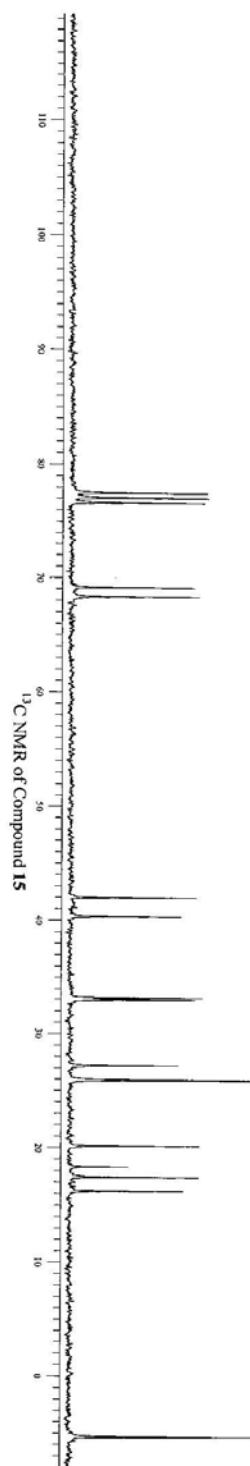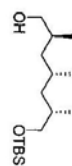

S20

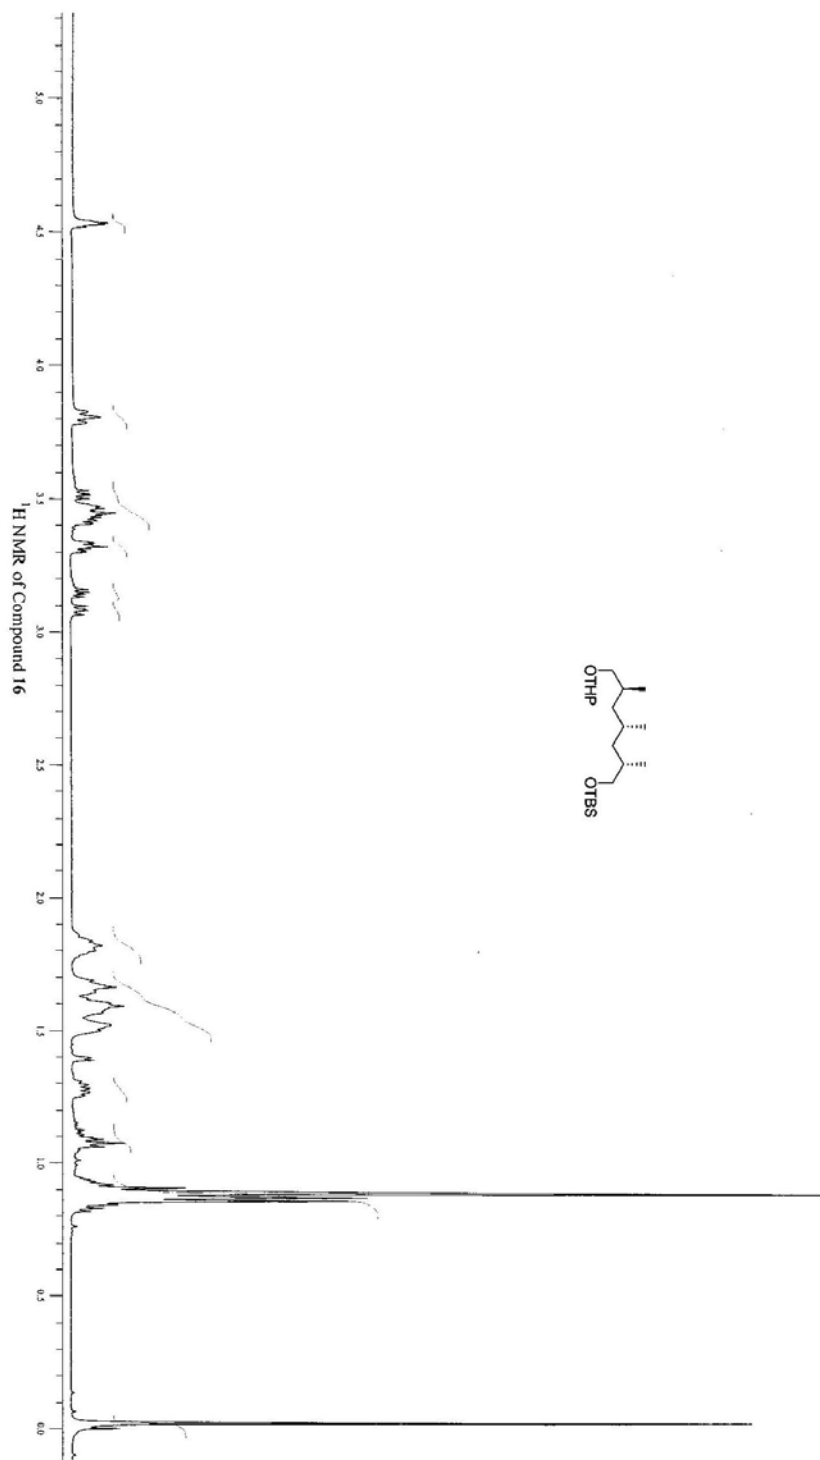

S21

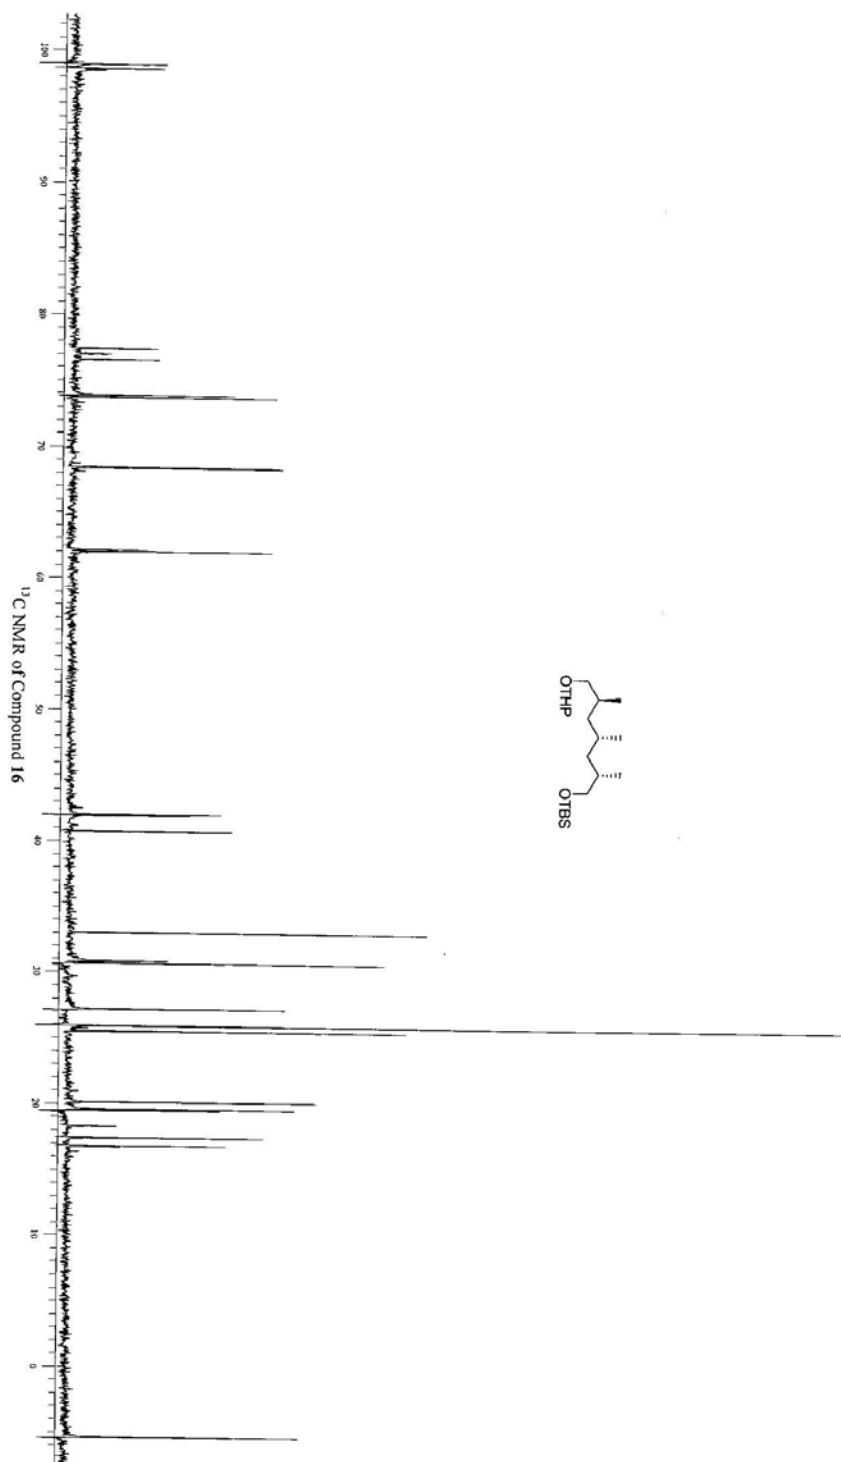

S22

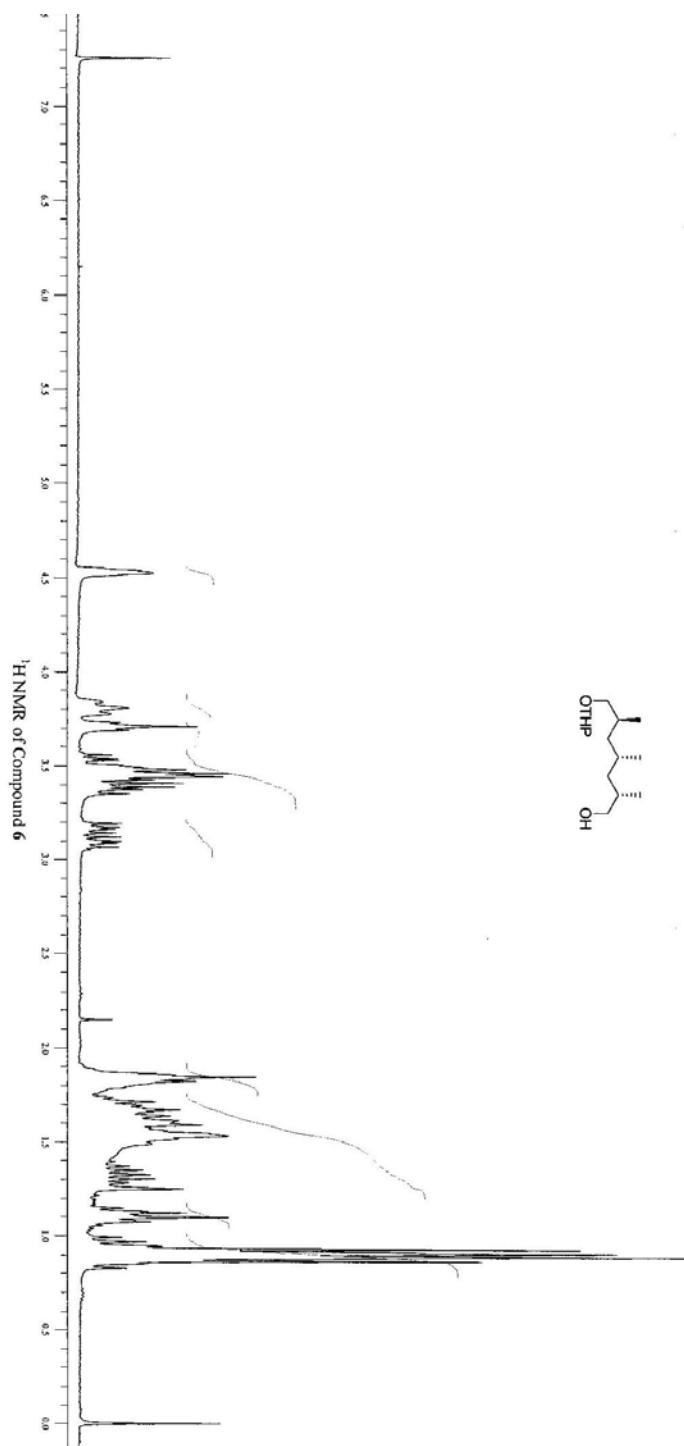

S23

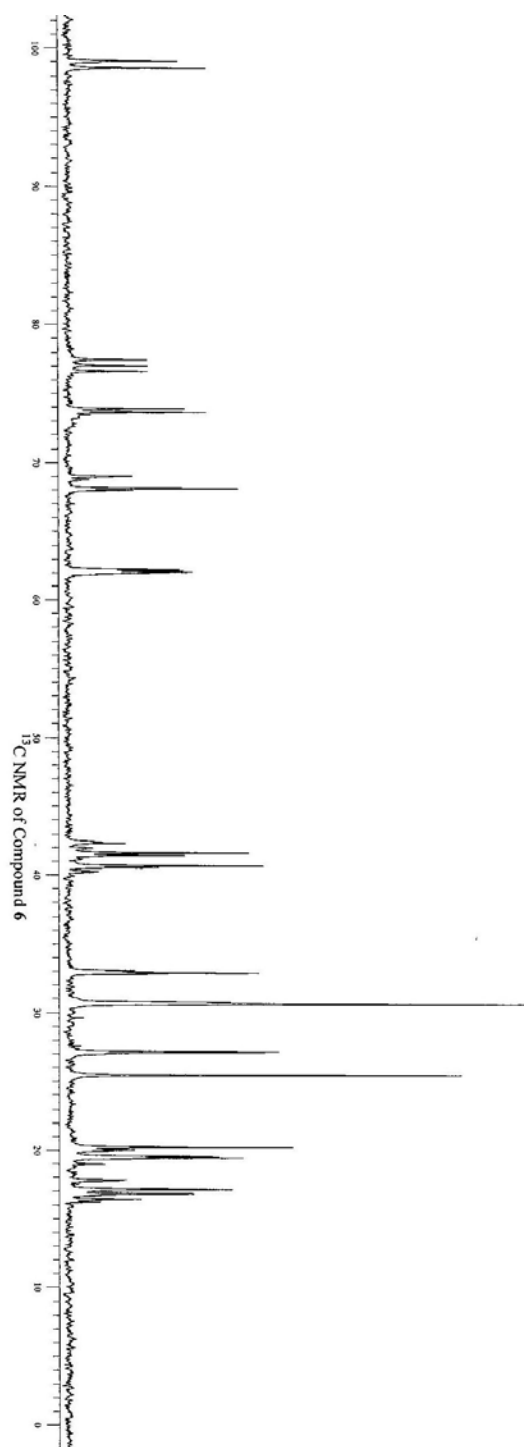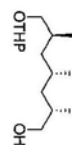



S24

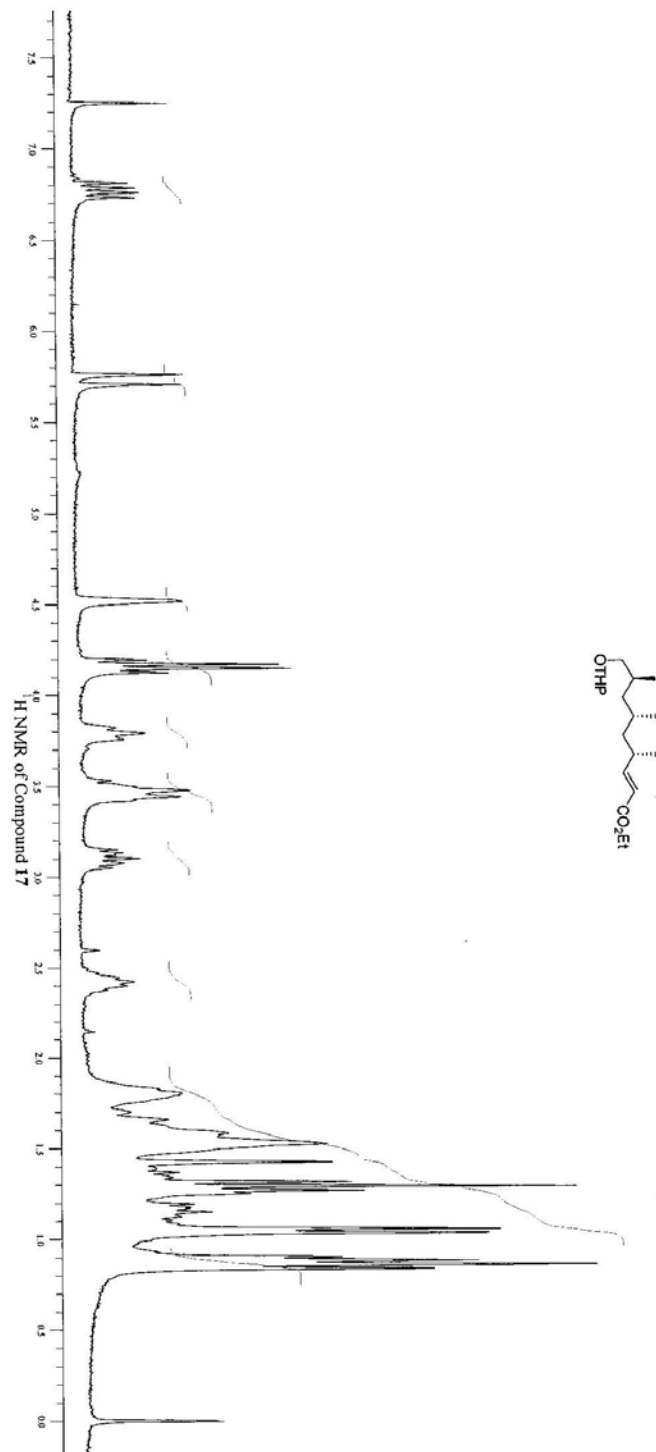

S25

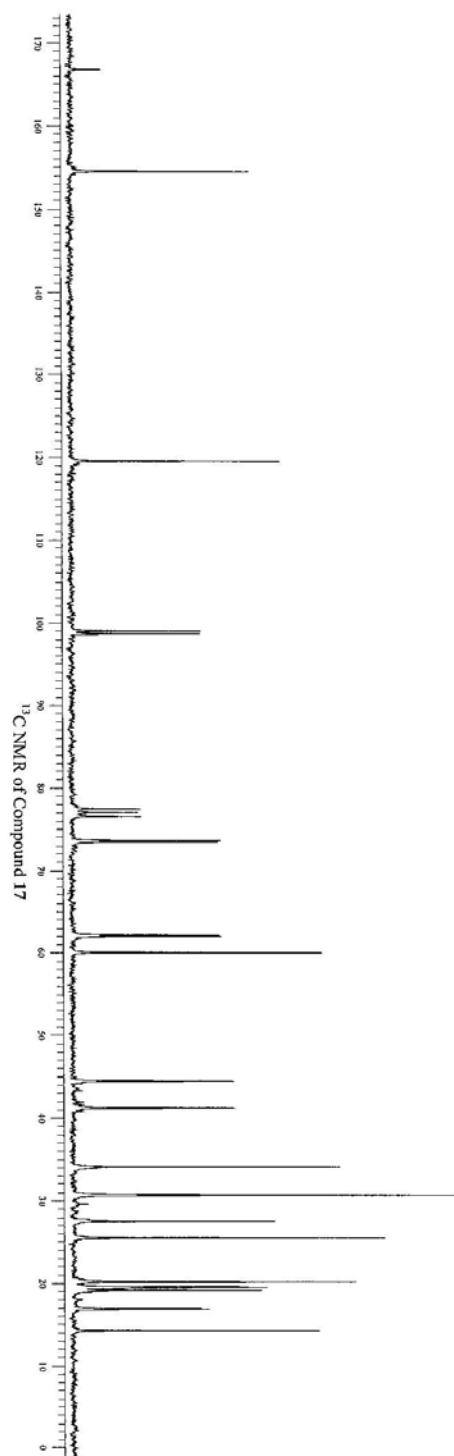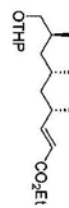

S26

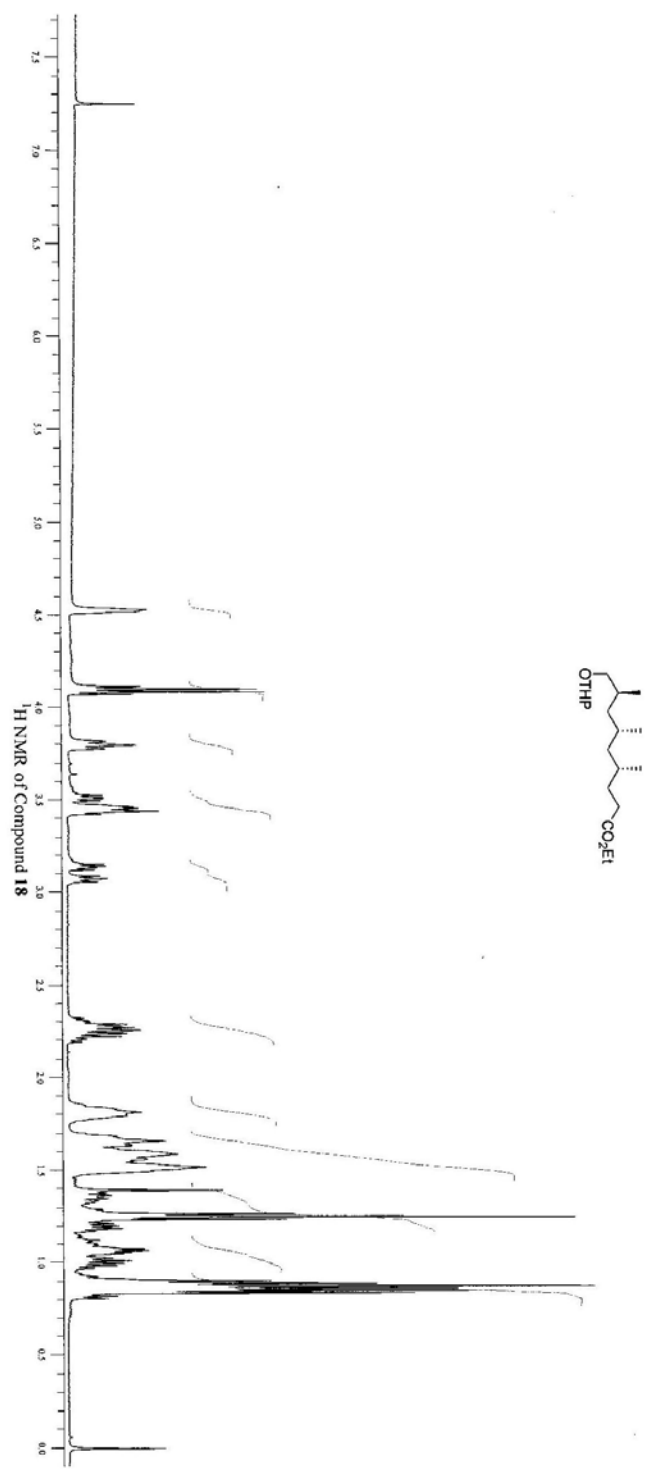

S27

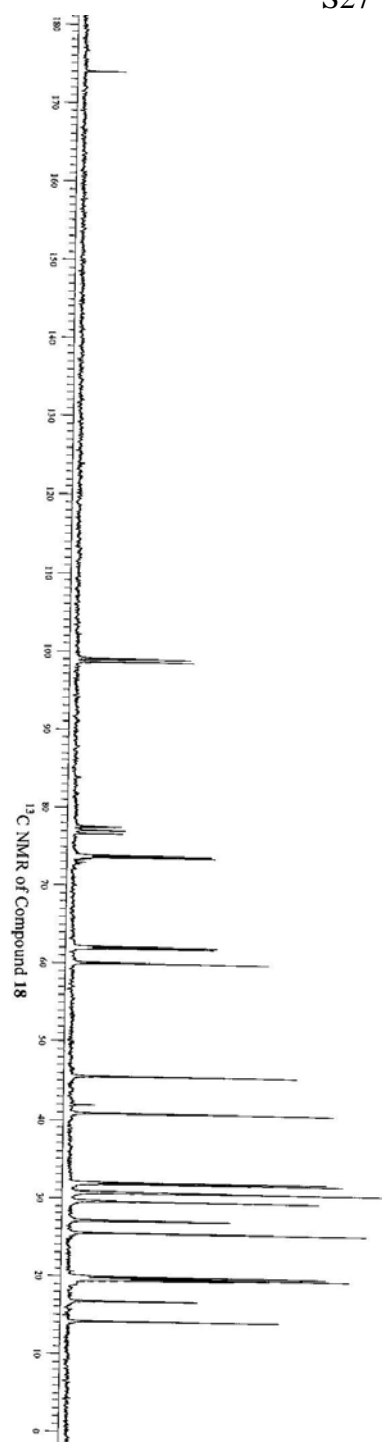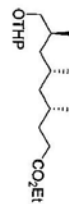

S28

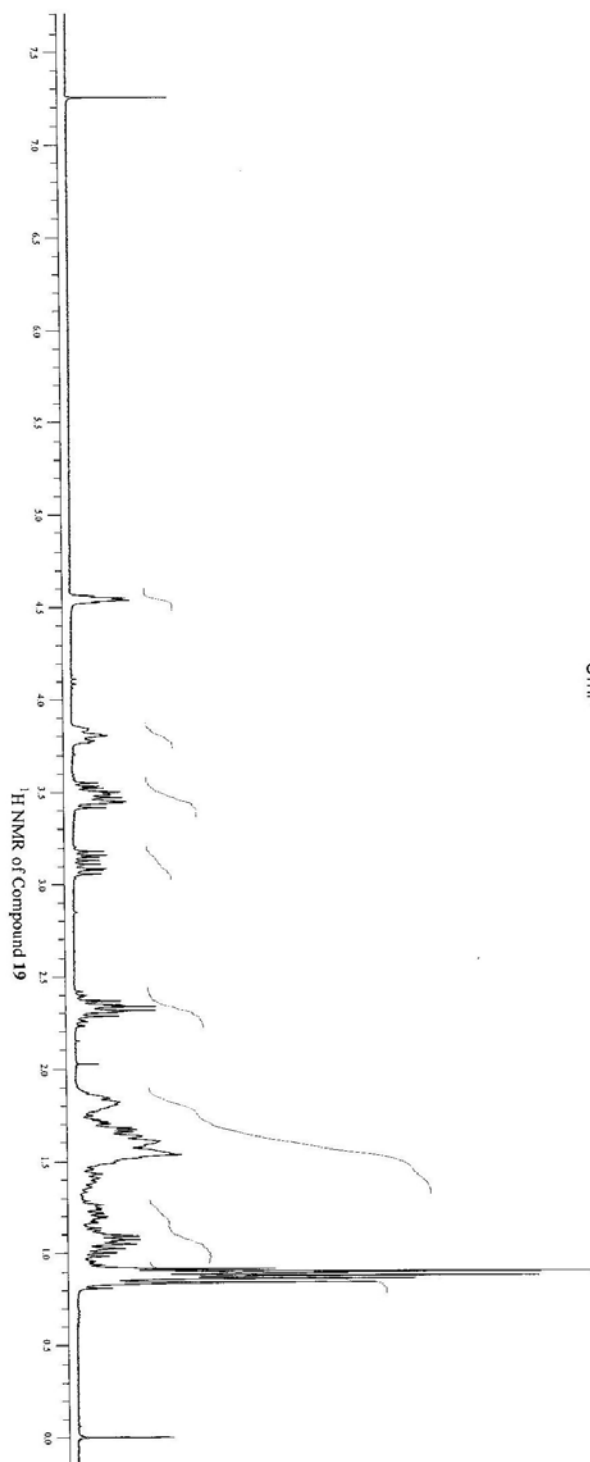

S29

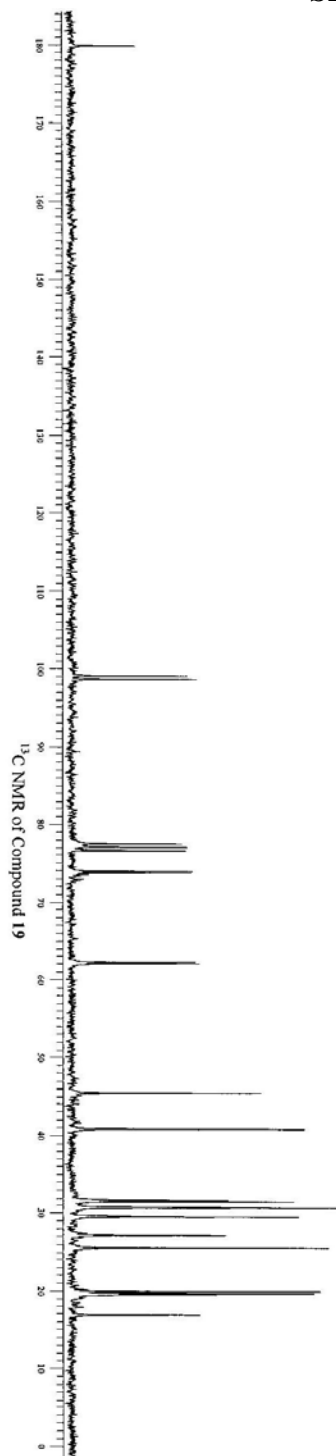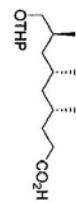

S30

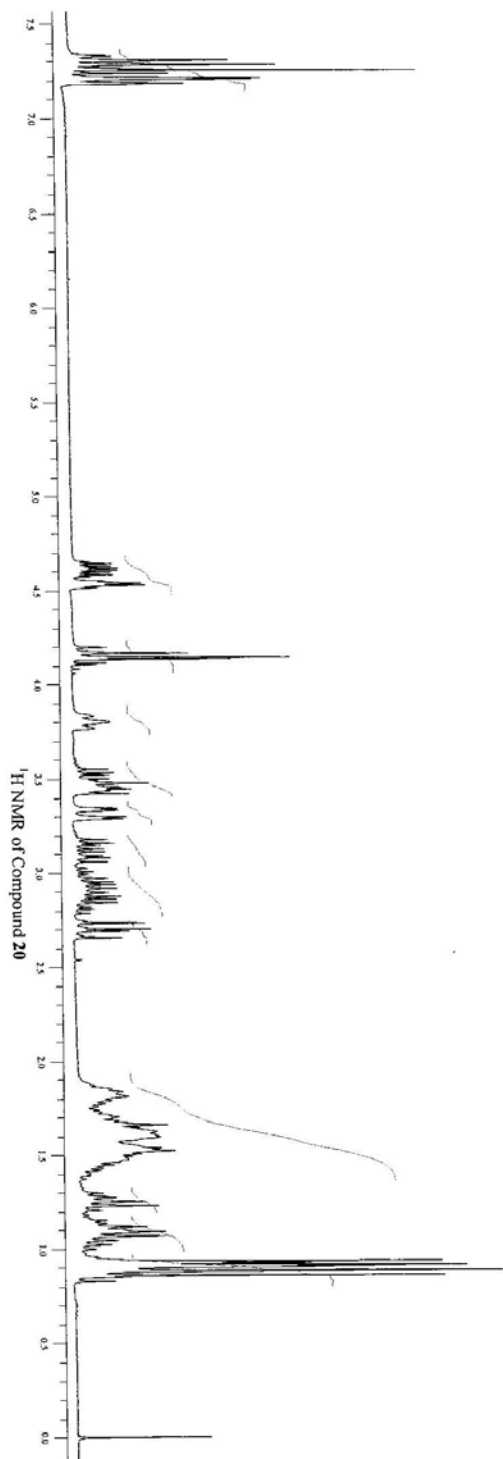

S31

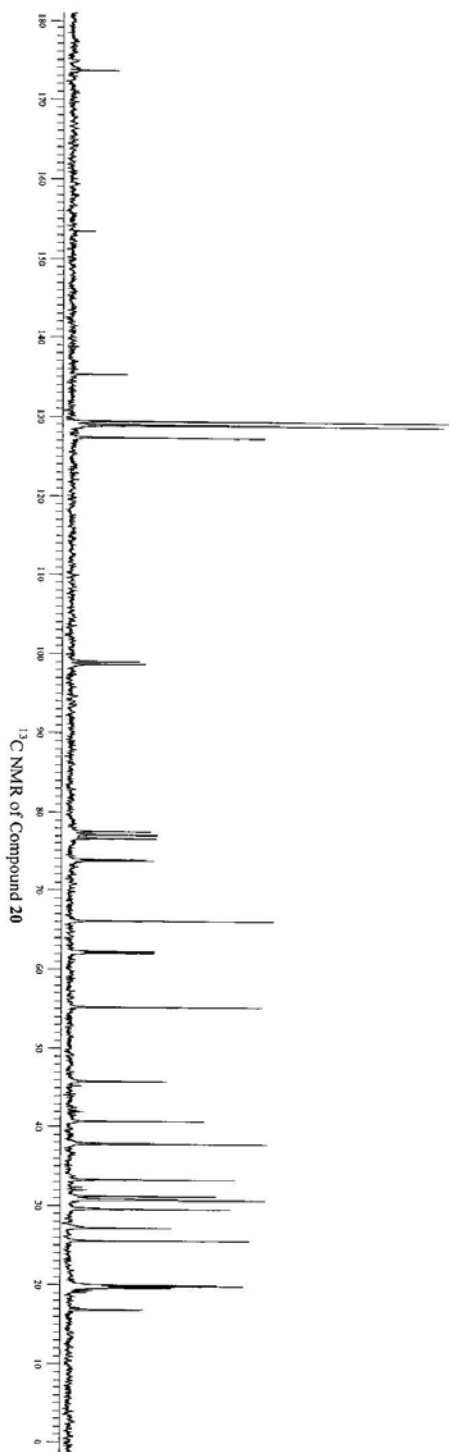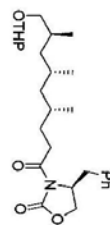



S32

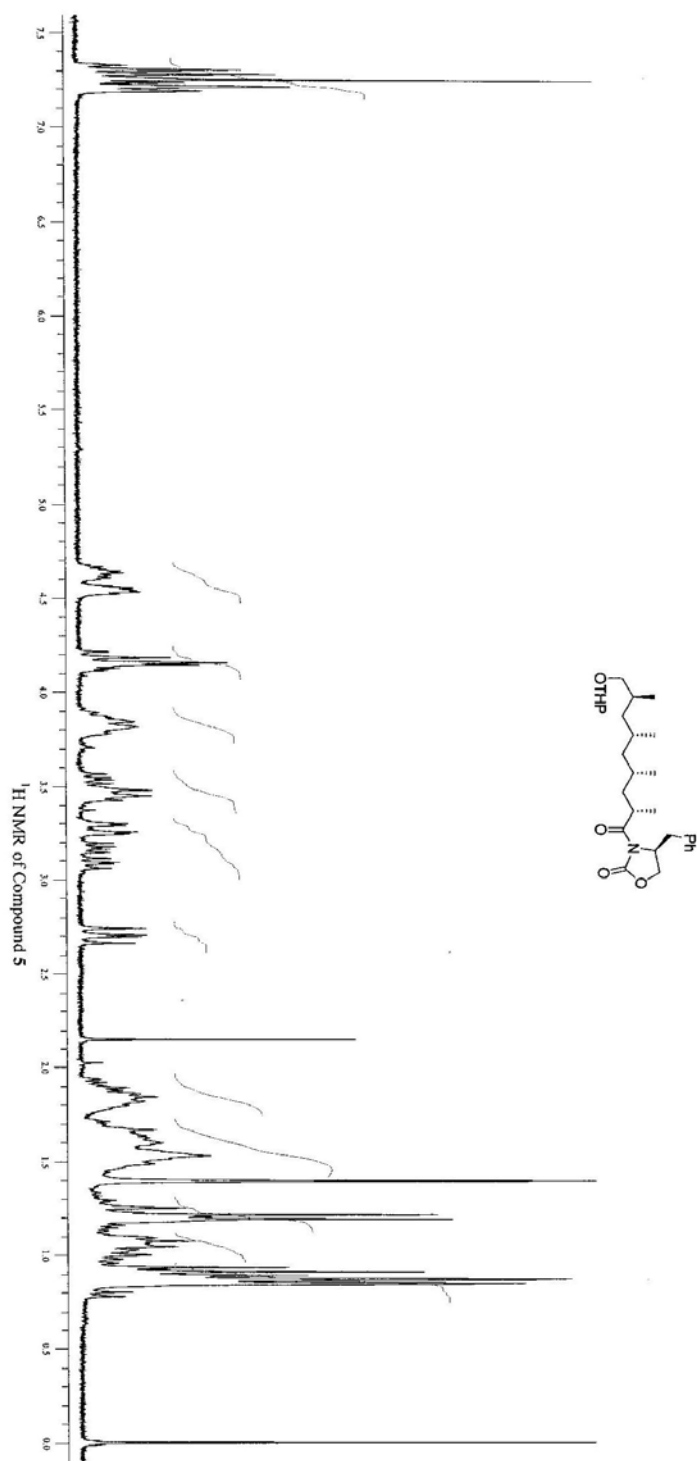

S33

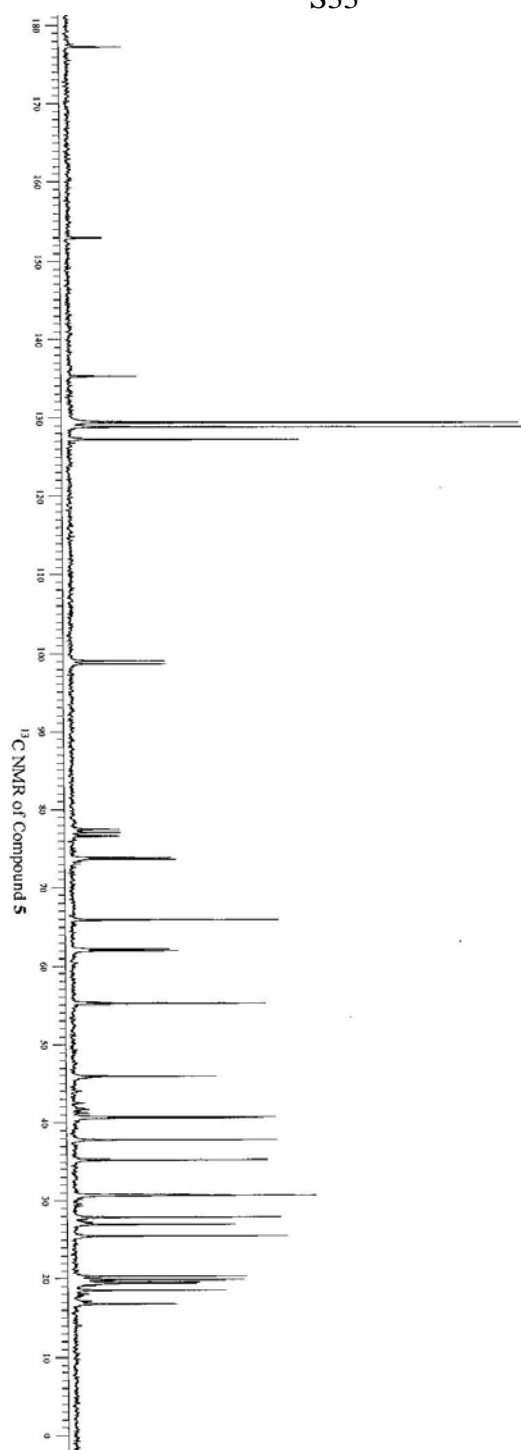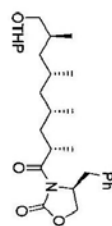

S34

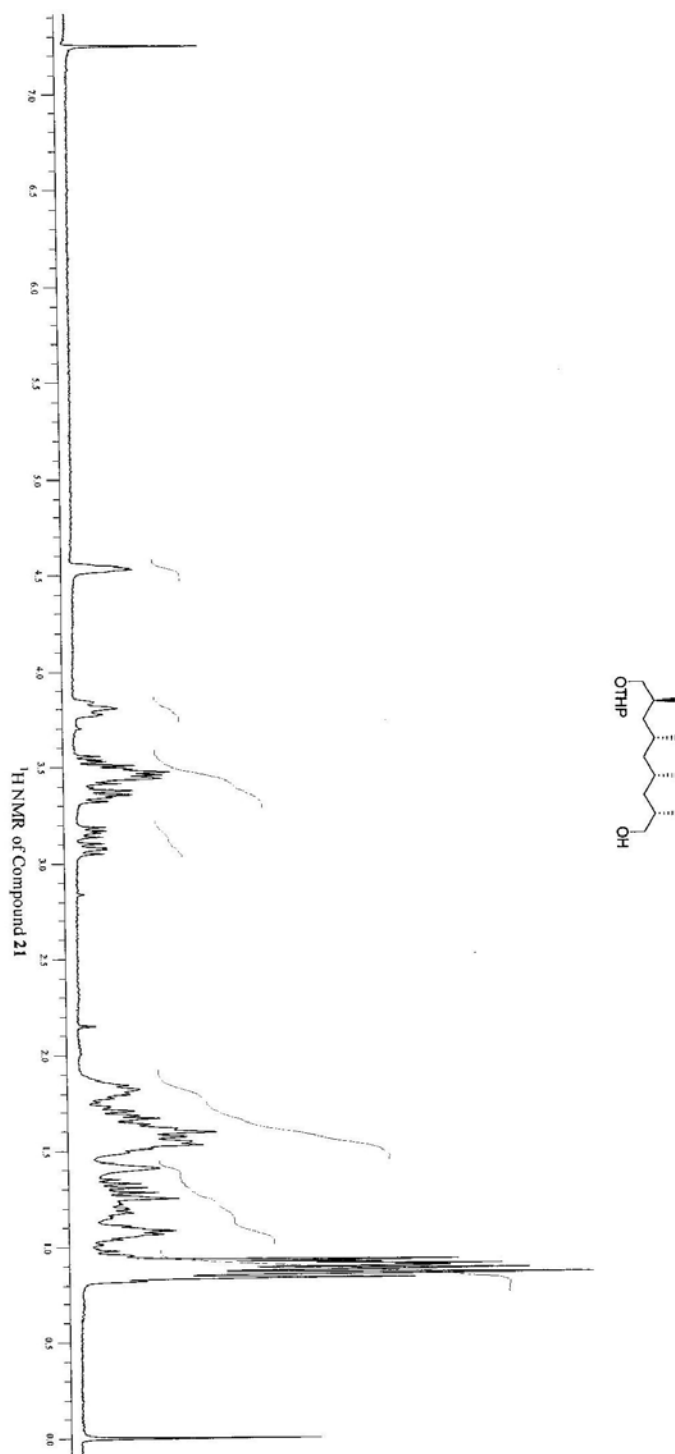

S35

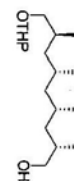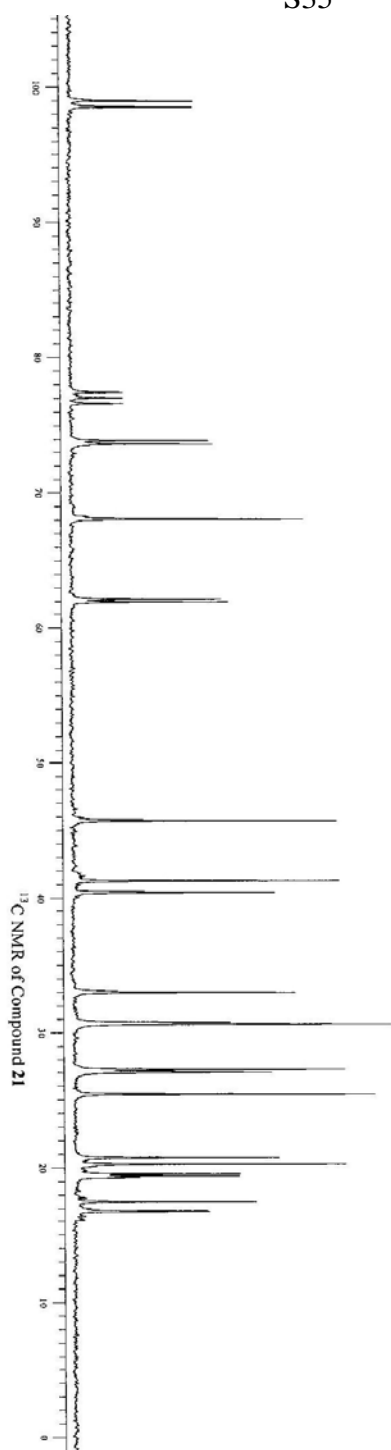

S36

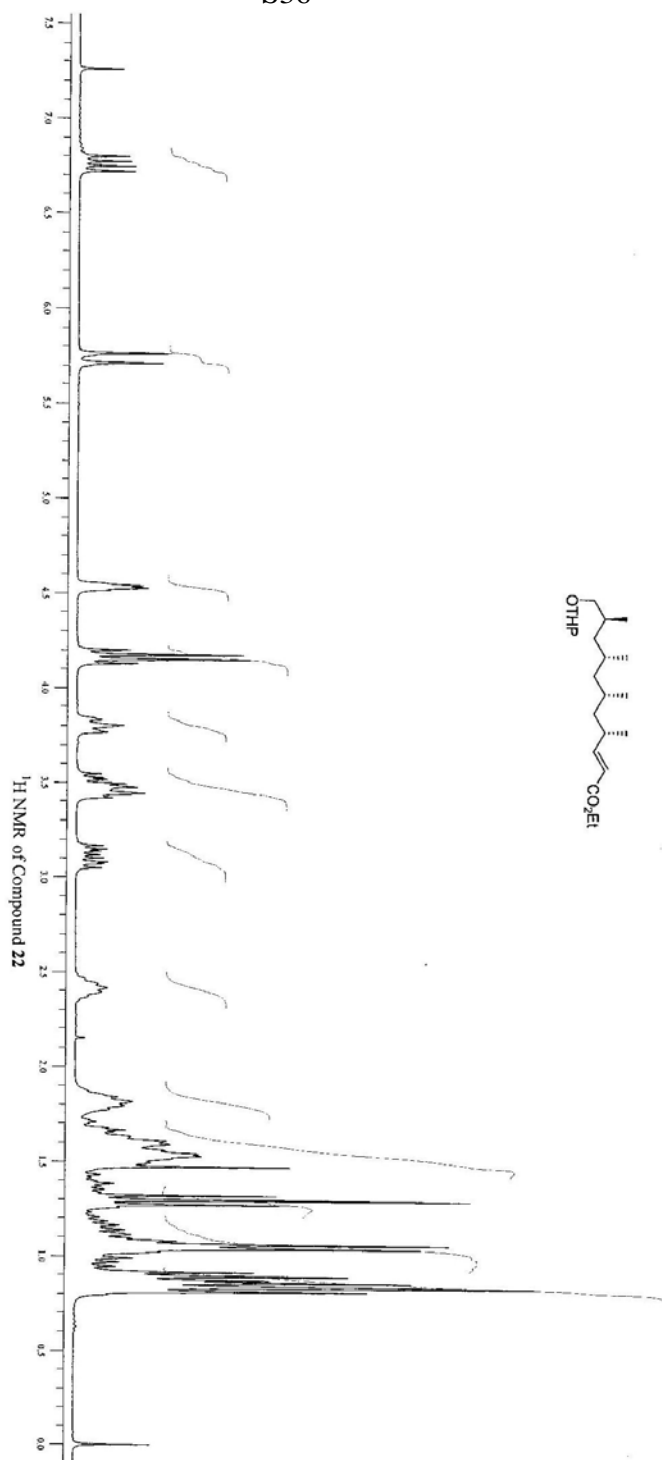

S37

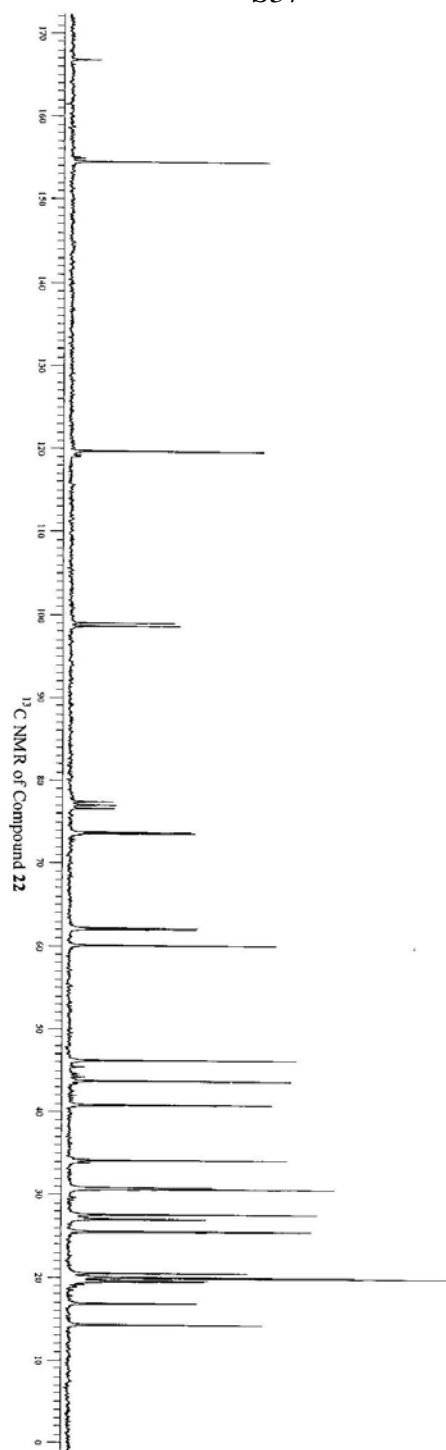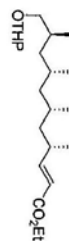

S38

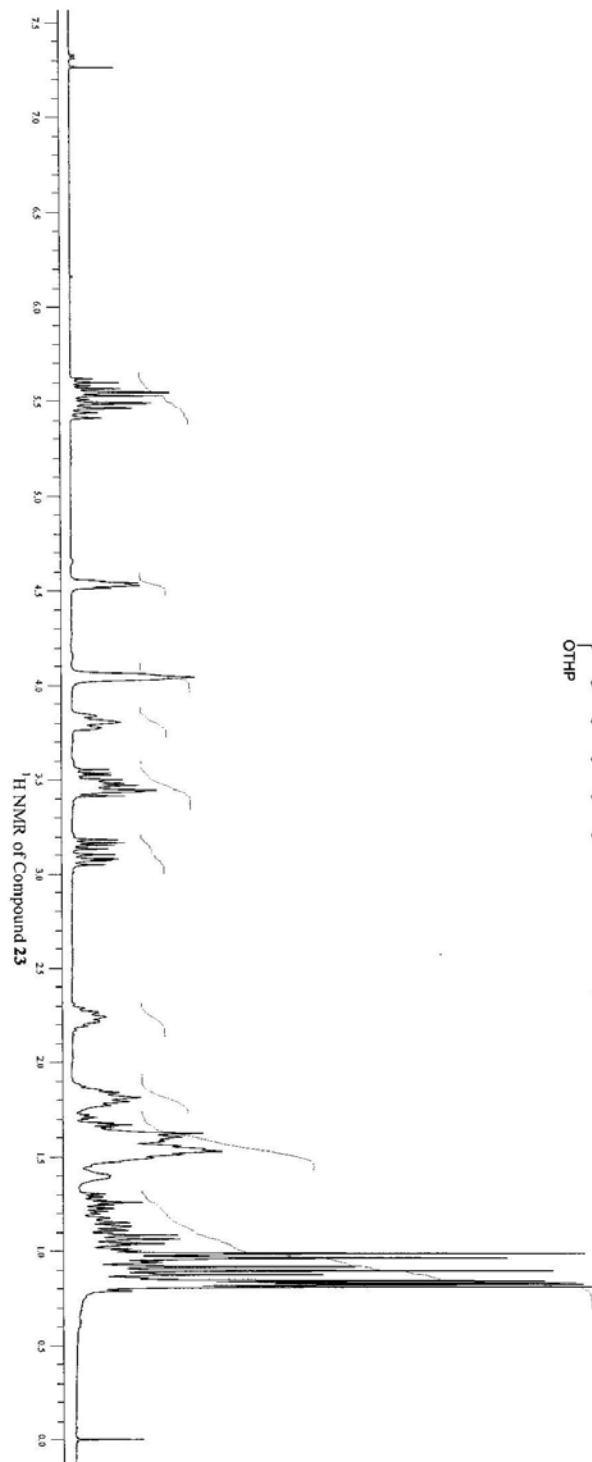

S39

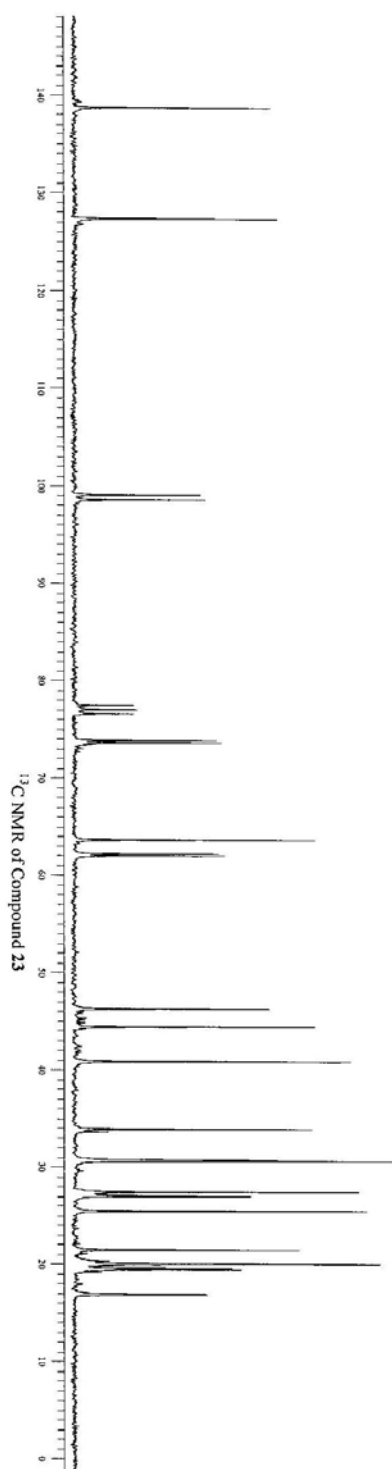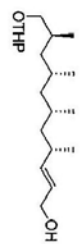



S40

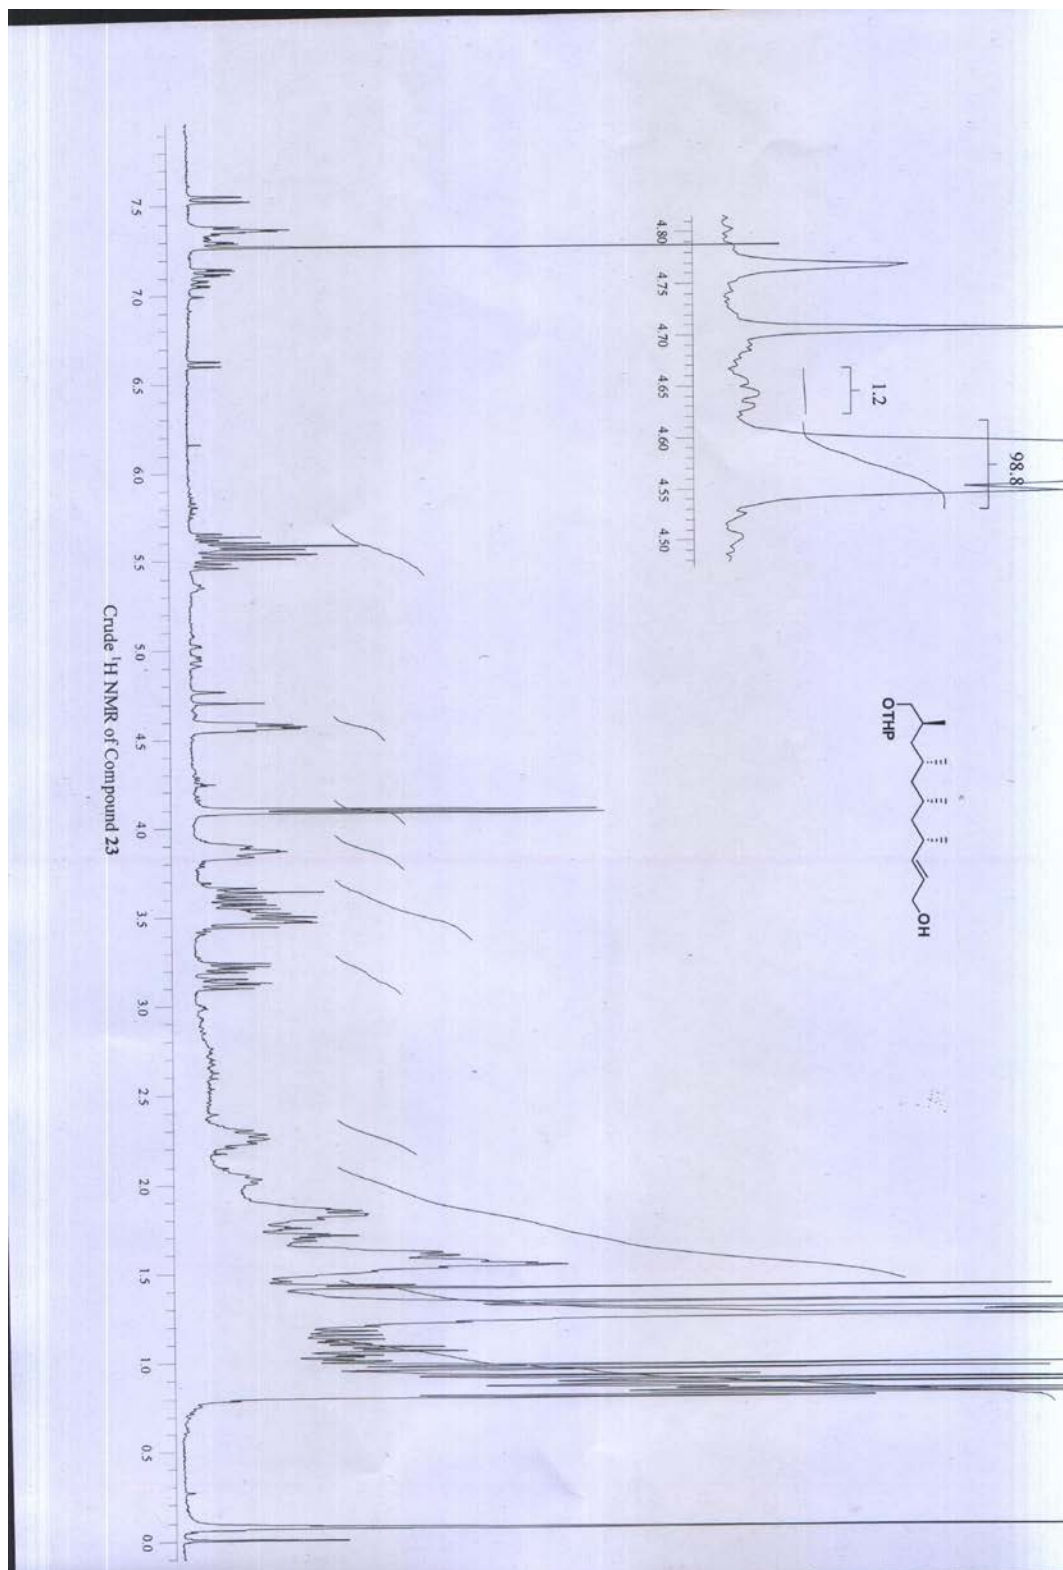

S41

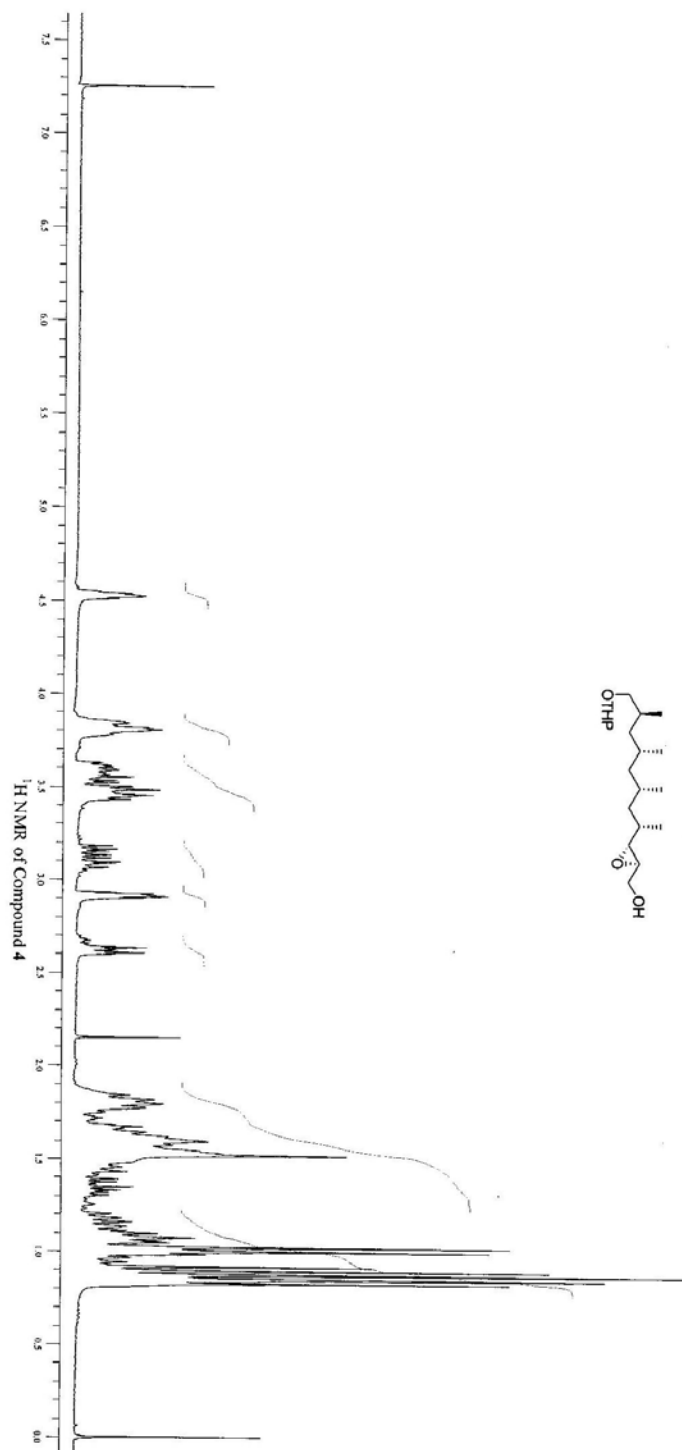

S42

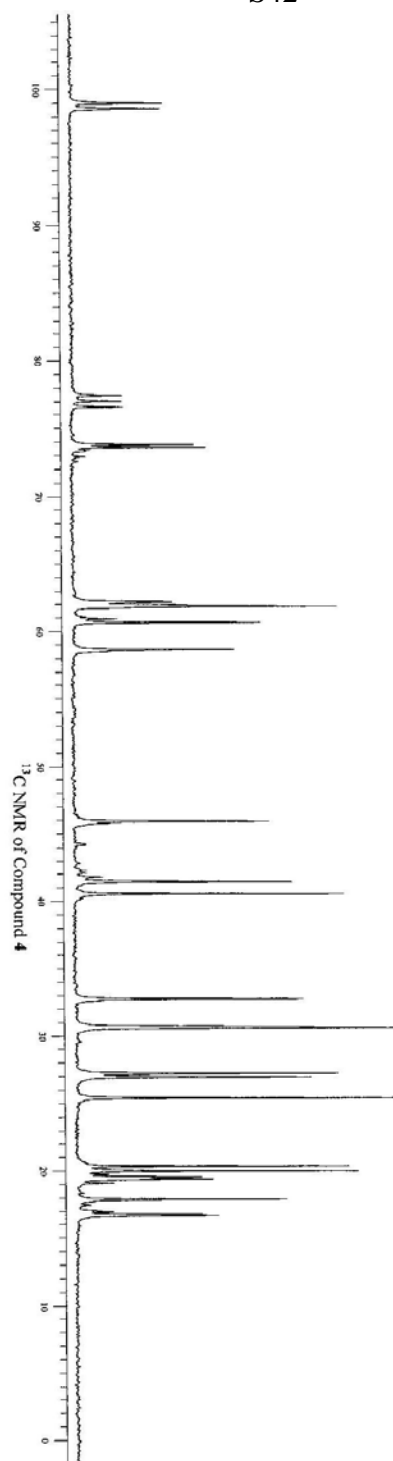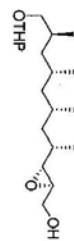

S43

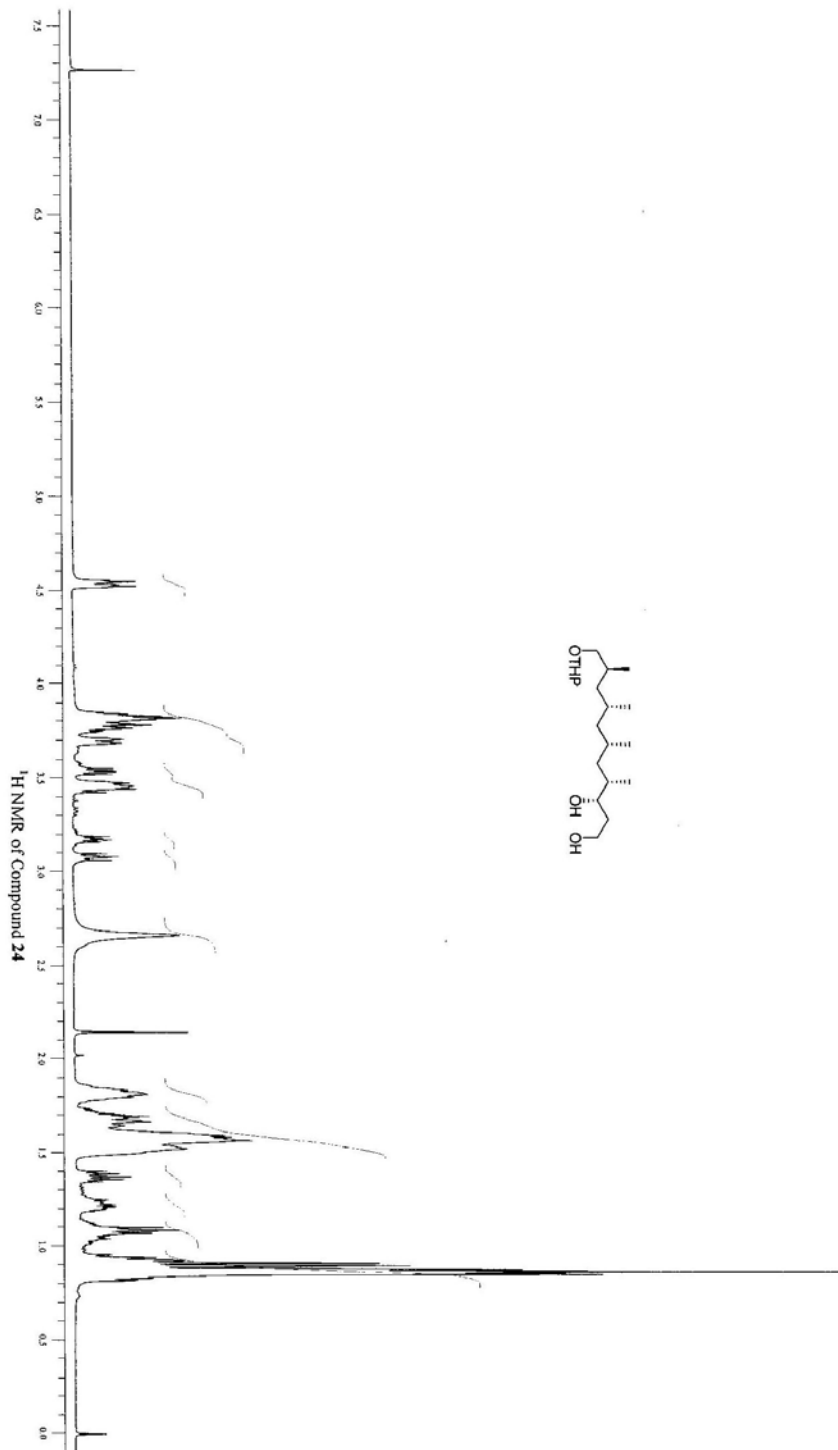

S44

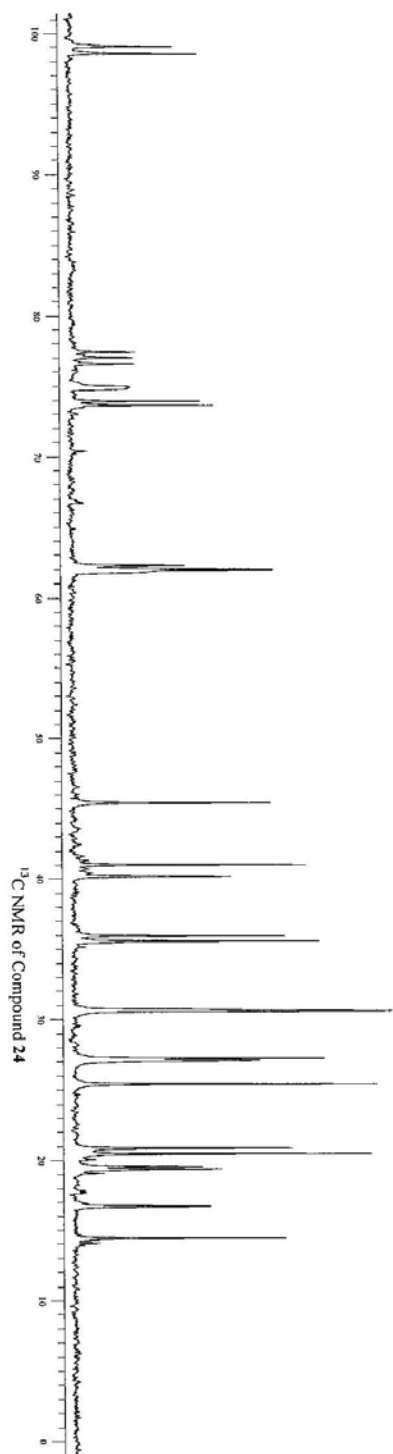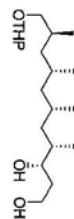

S45

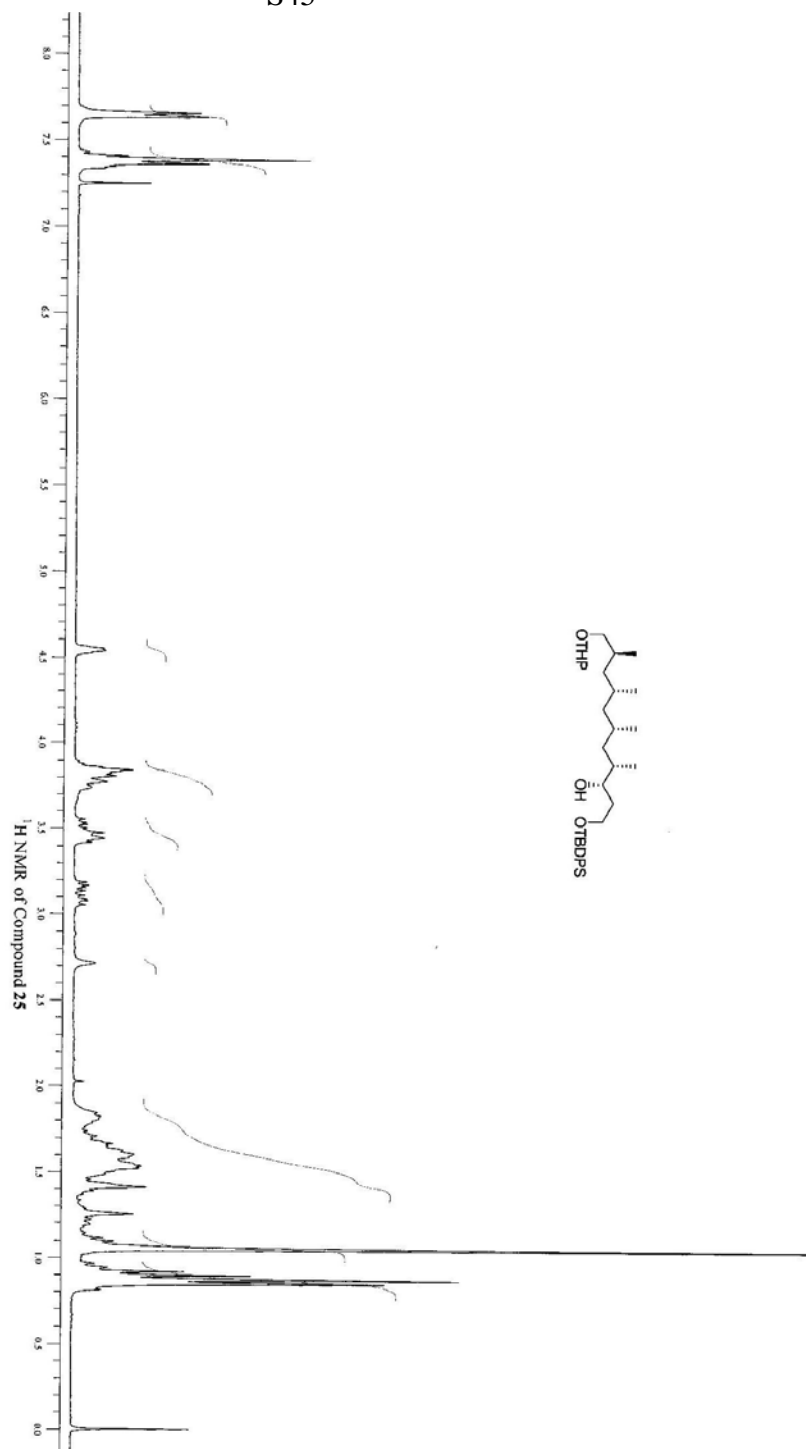

S46

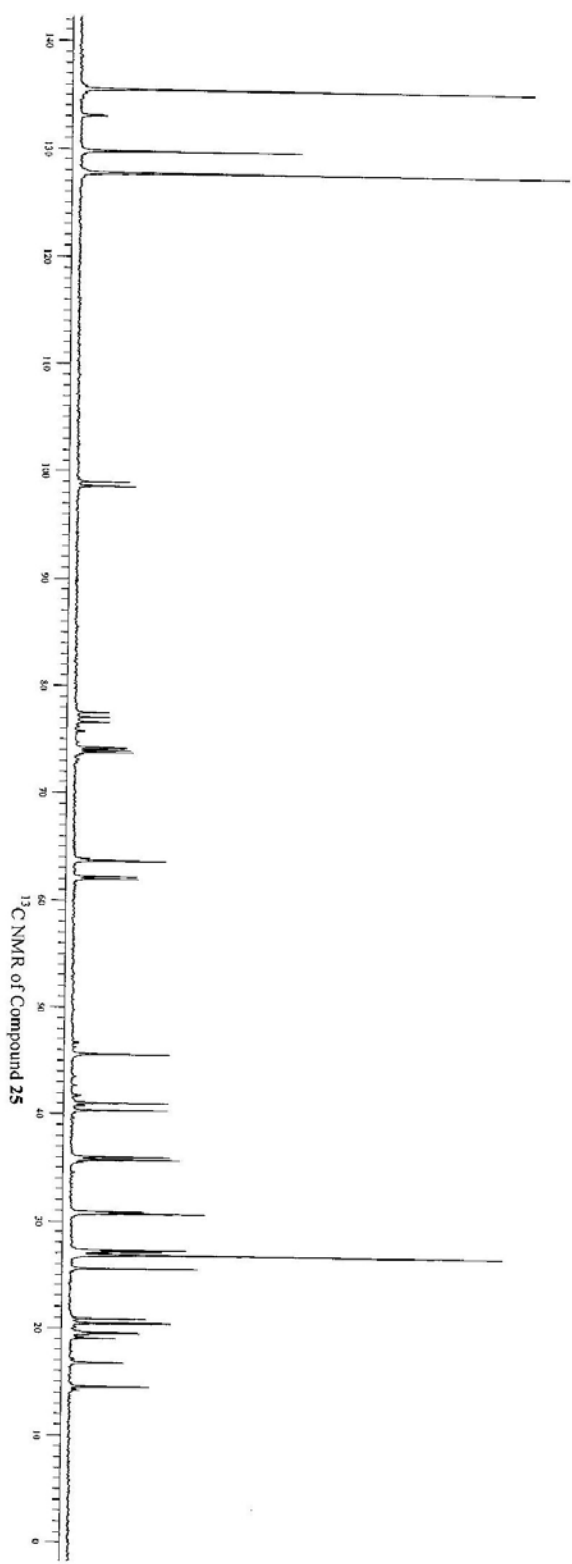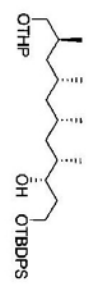

S47

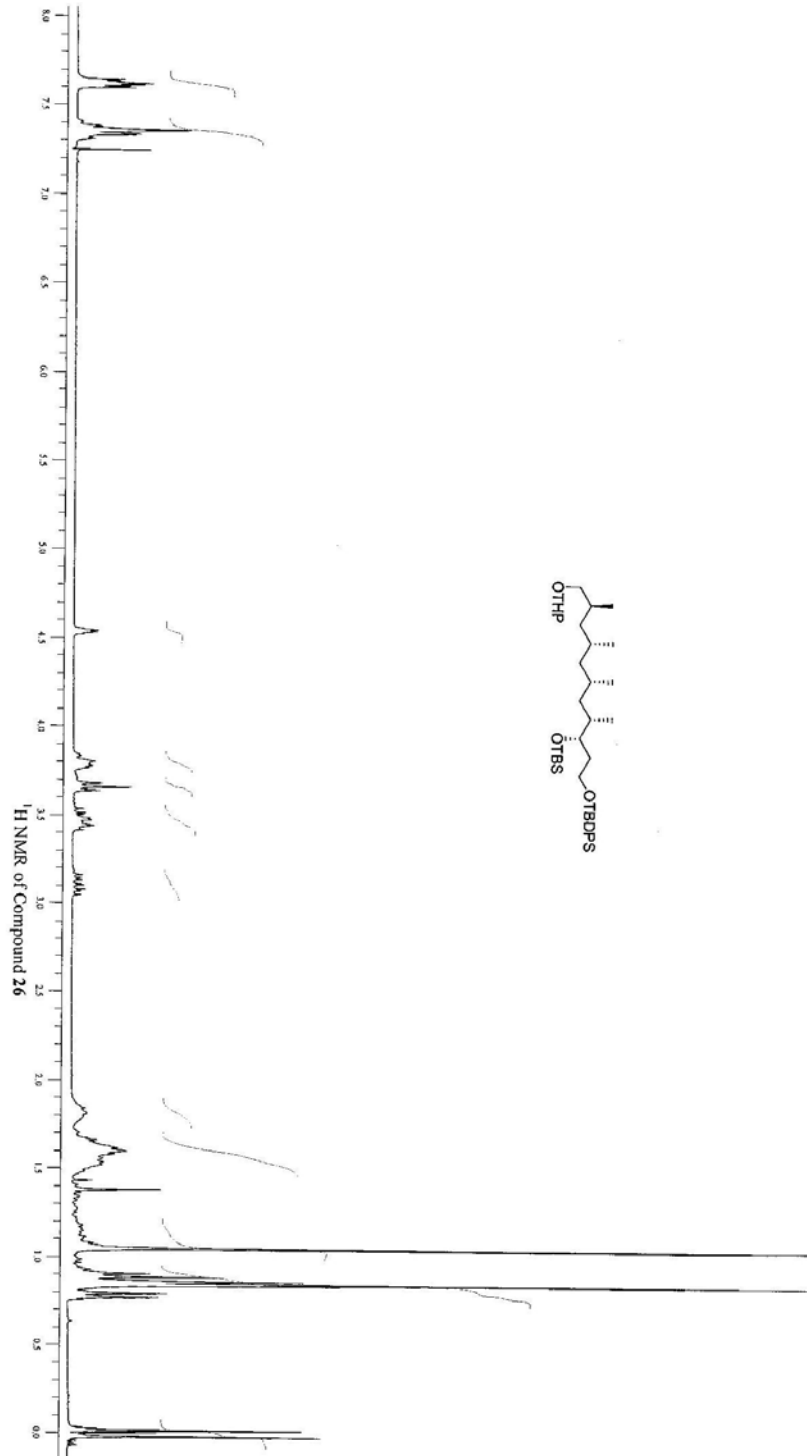



S48

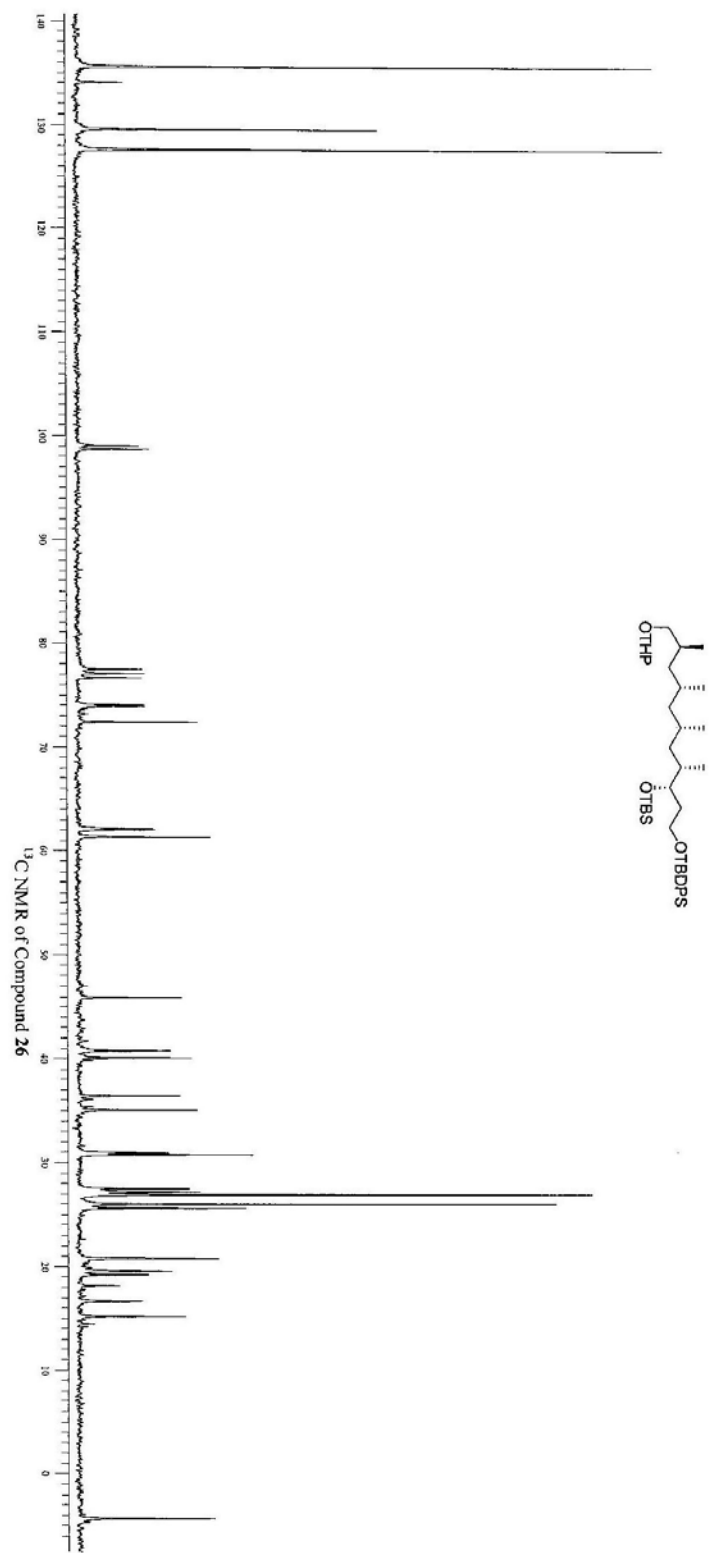

S49

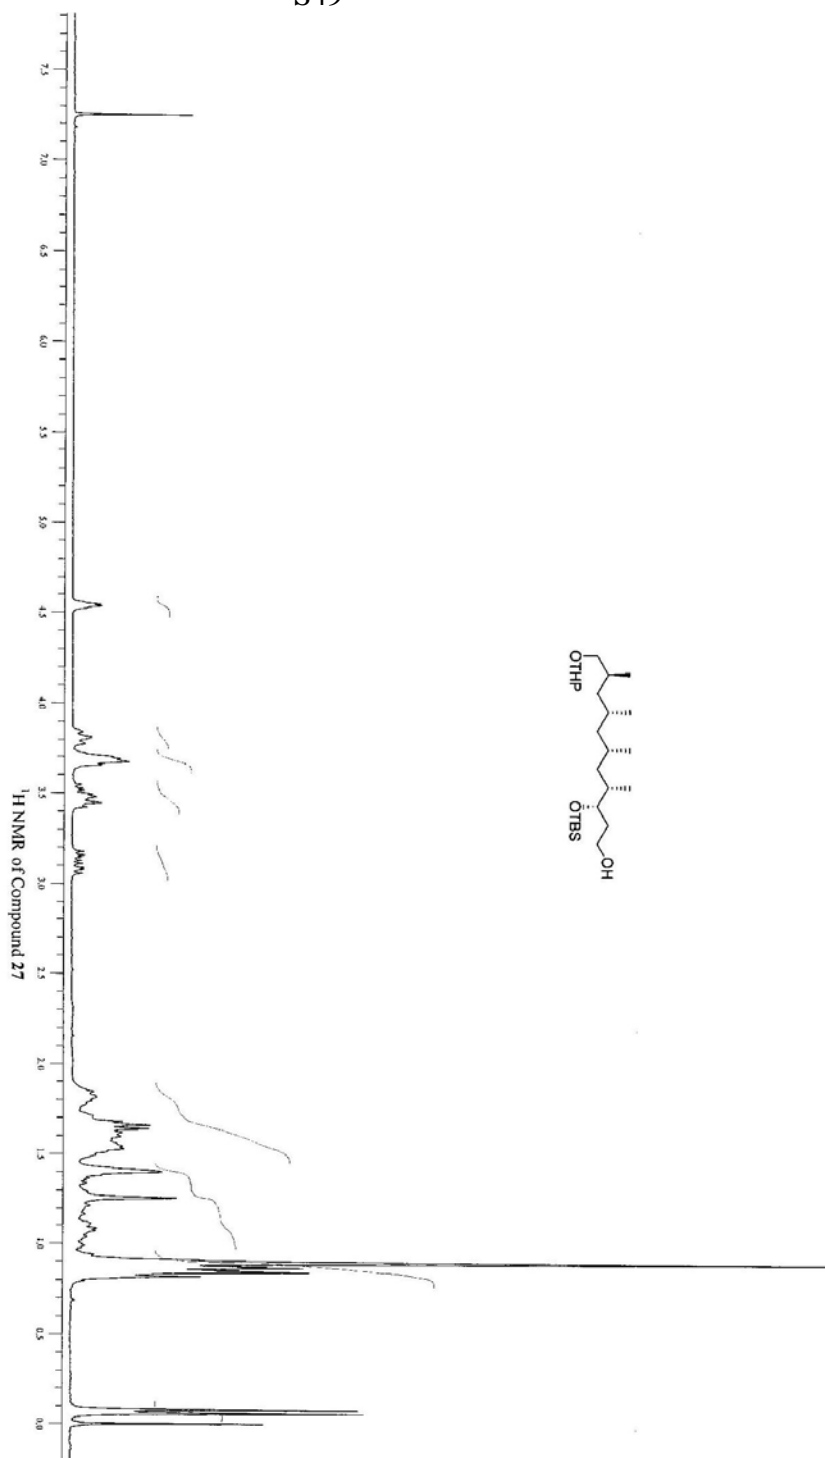

S50

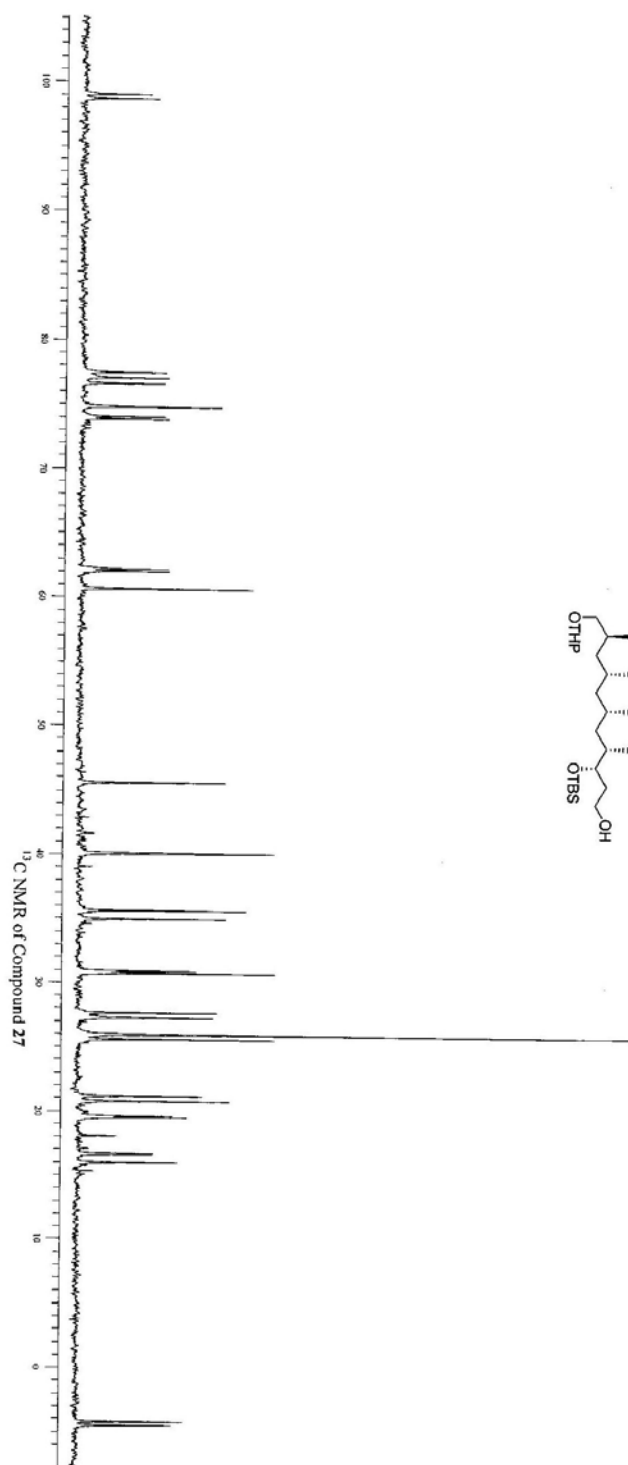

S51

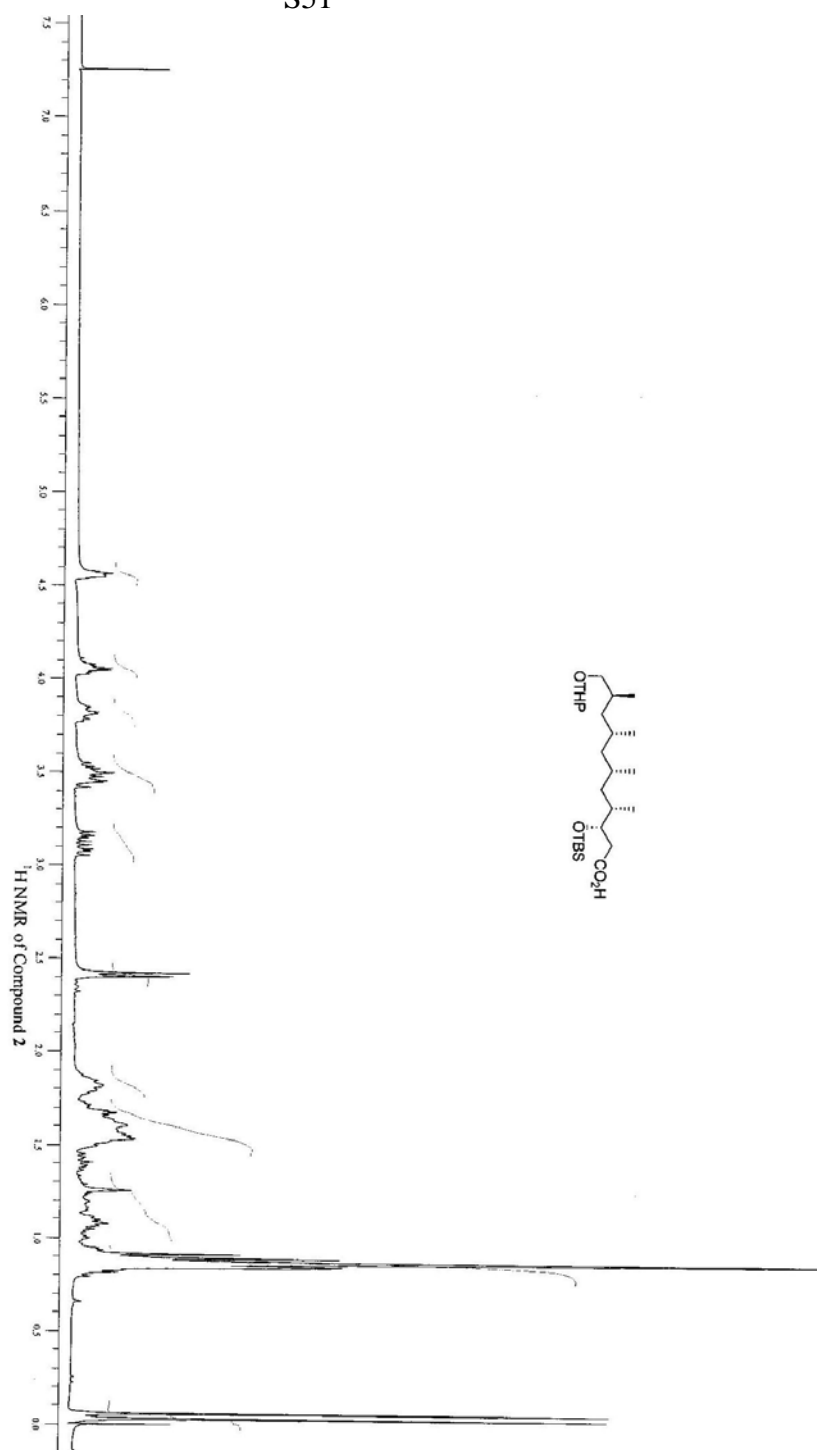

S52

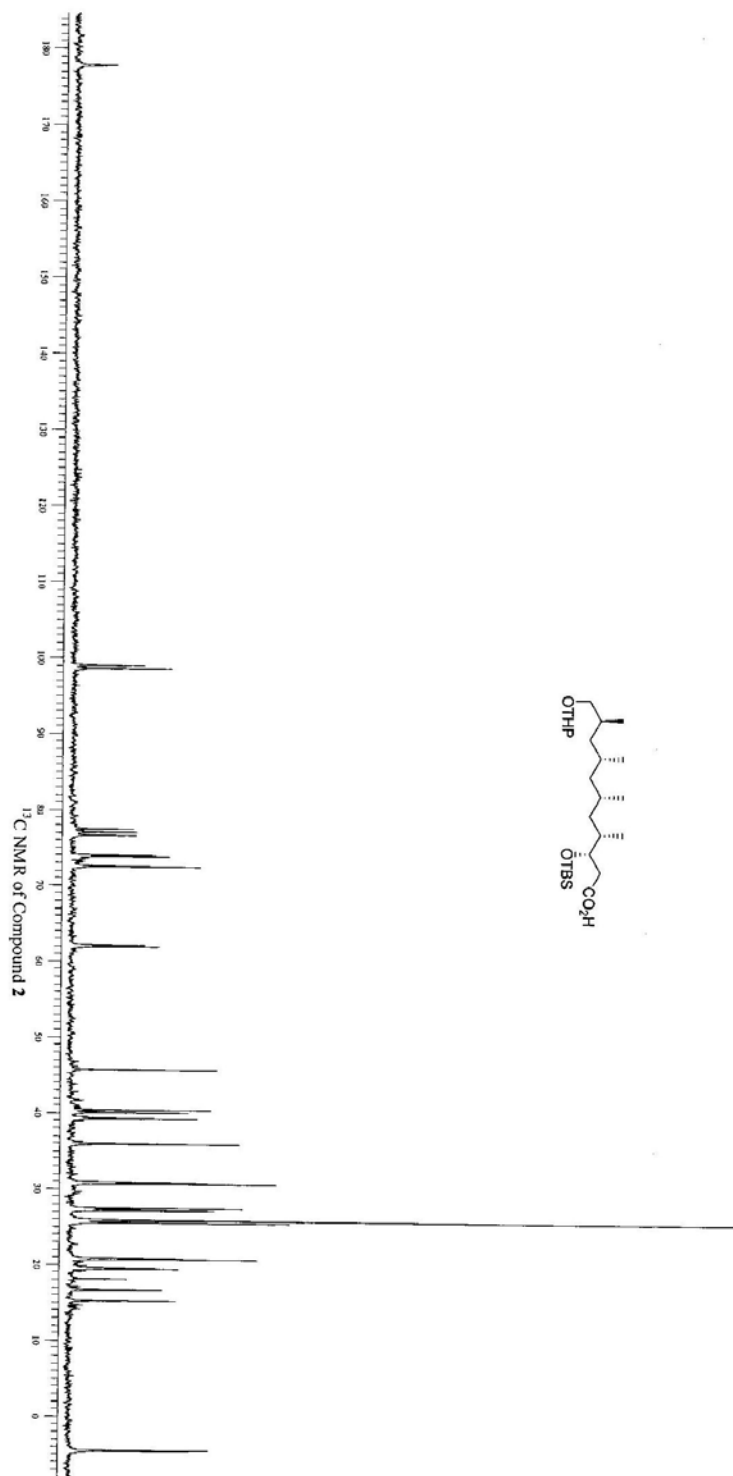

Supplement: c3ra22754e.pdf [file c3ra22754e.pdf]
